# Supplementary material for: Identification of Key Genes Associated with Tumor Microenvironment Infiltration and Survival in Gastric Adenocarcinoma via Bioinformatics Analysis
Source: MDPI journal article supplement (doi:10.3390/cancers16071280), 2024-03-26

Figure S1. Pearson correlation between the infiltration level of the tumor-microenvironment component and the expression level of the genes.

a) BGN

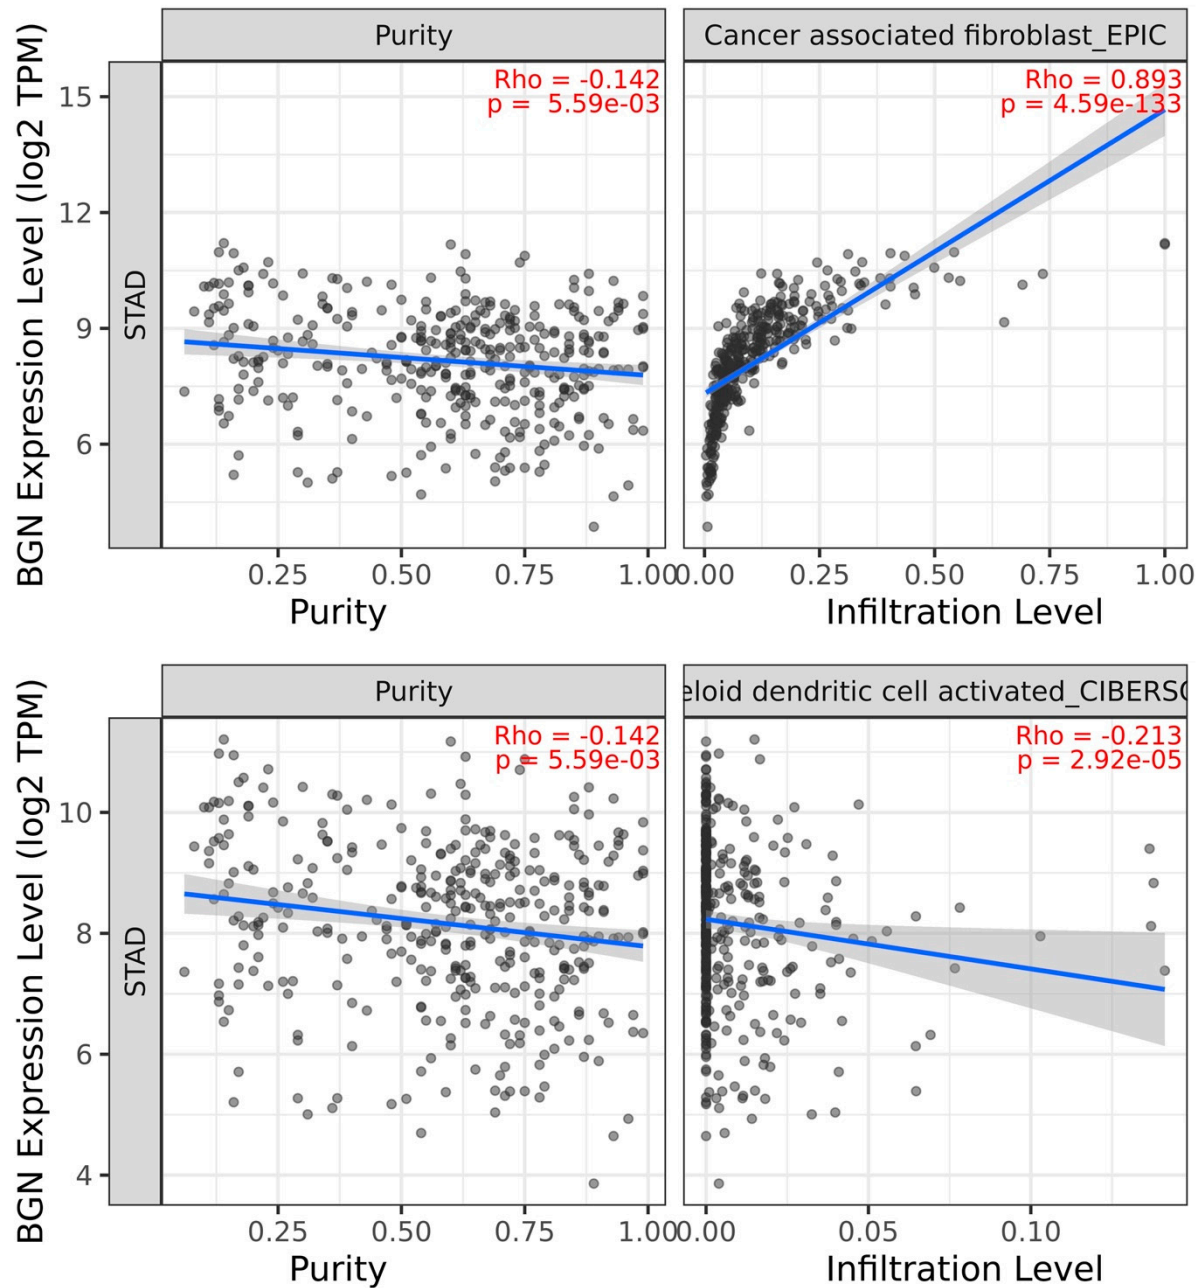

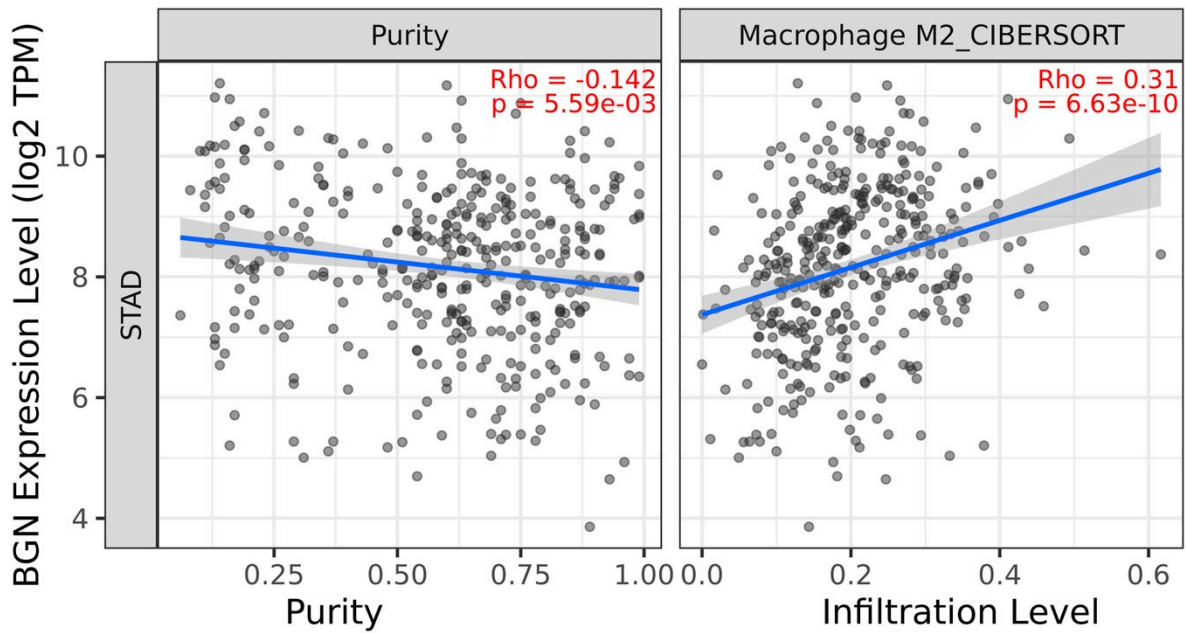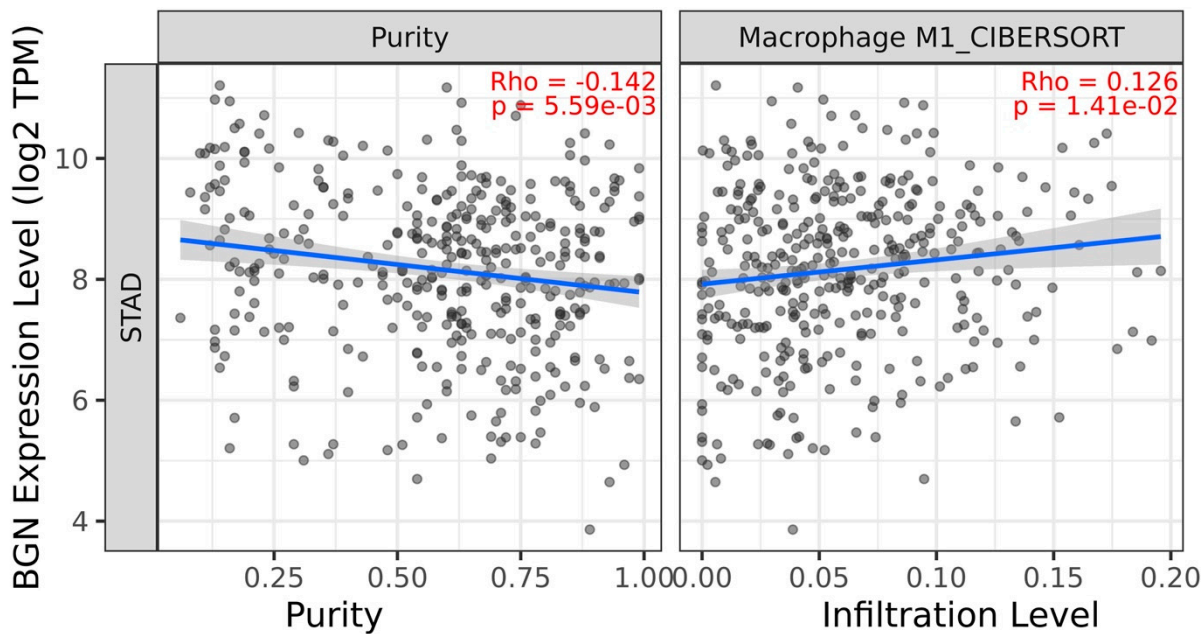

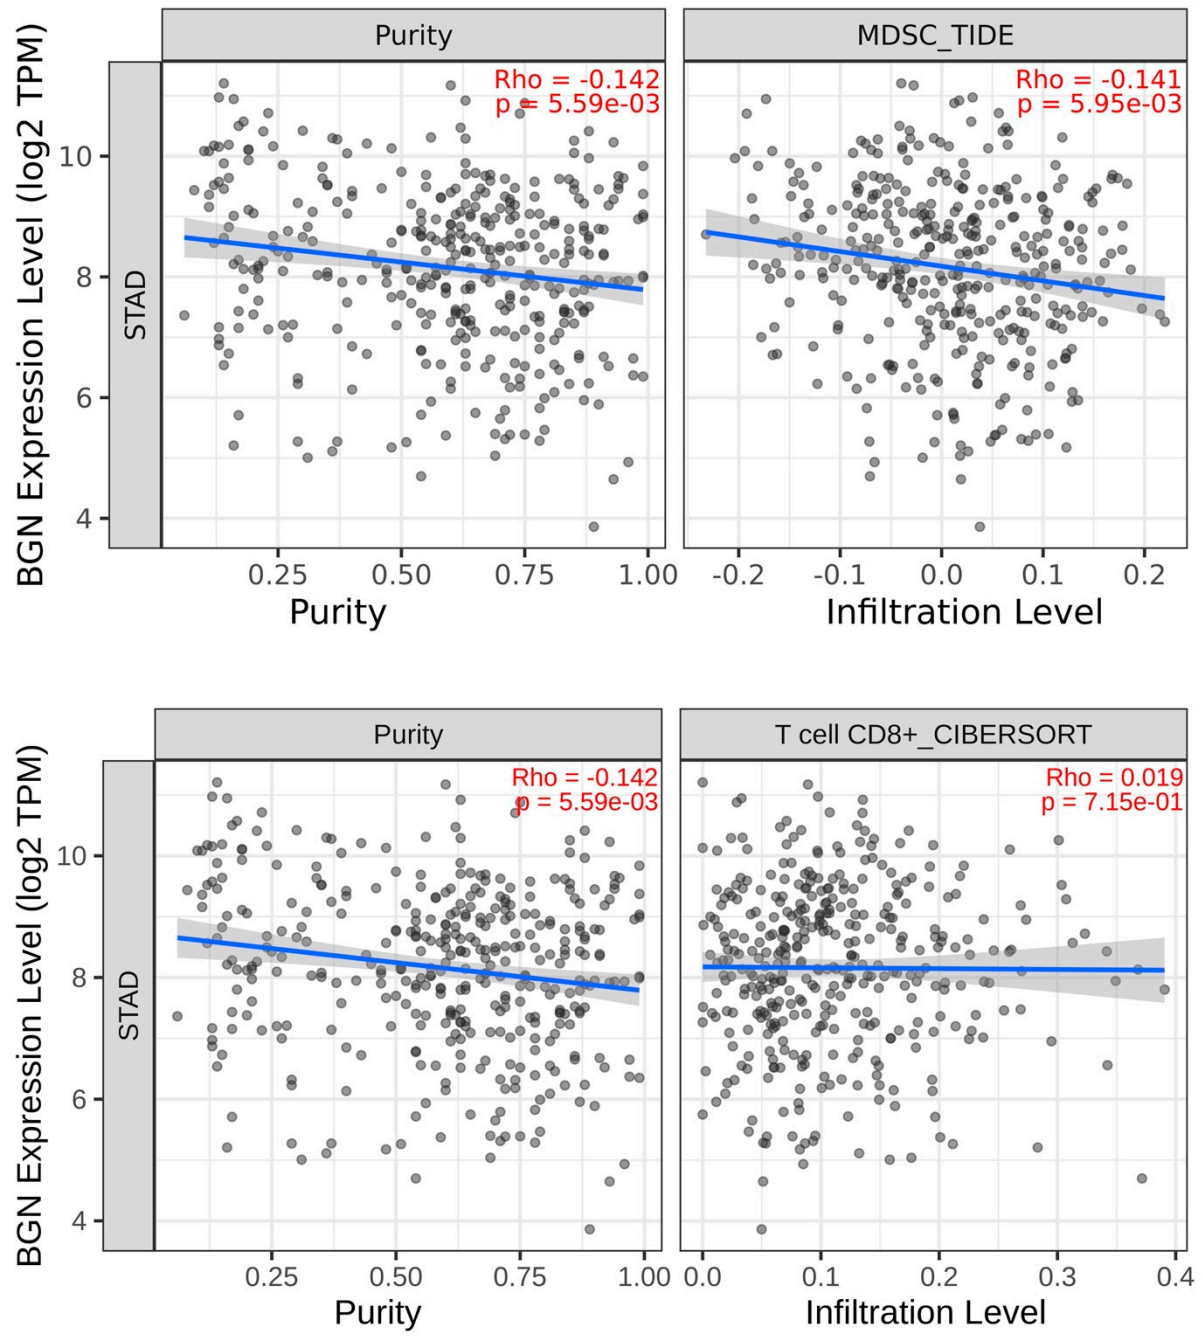

B) FN1

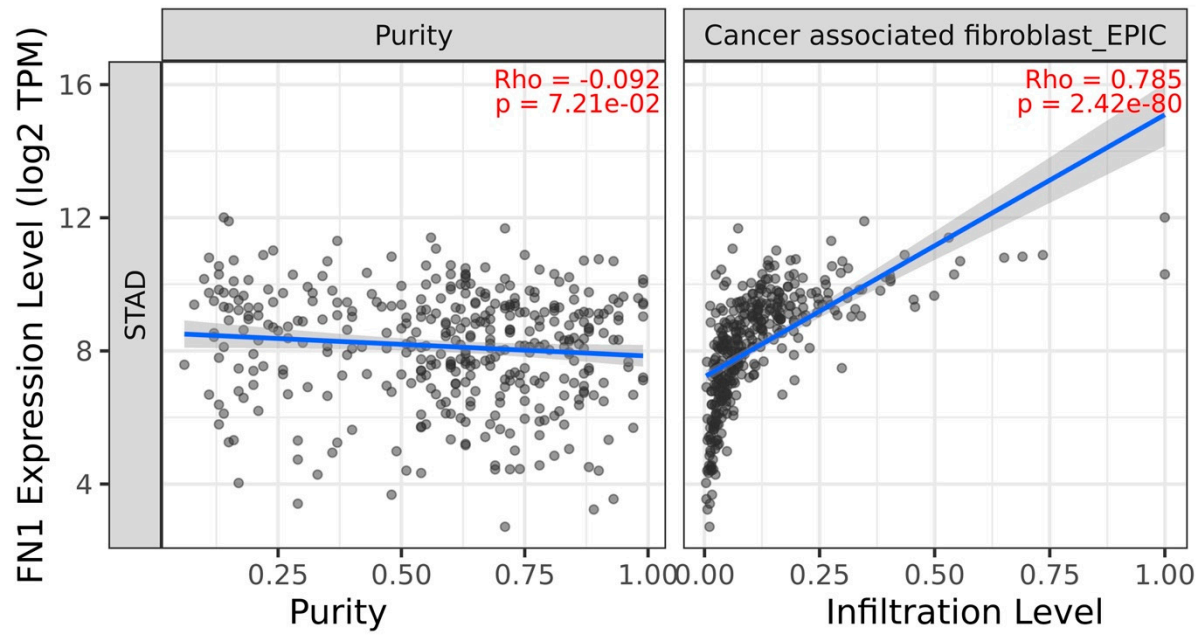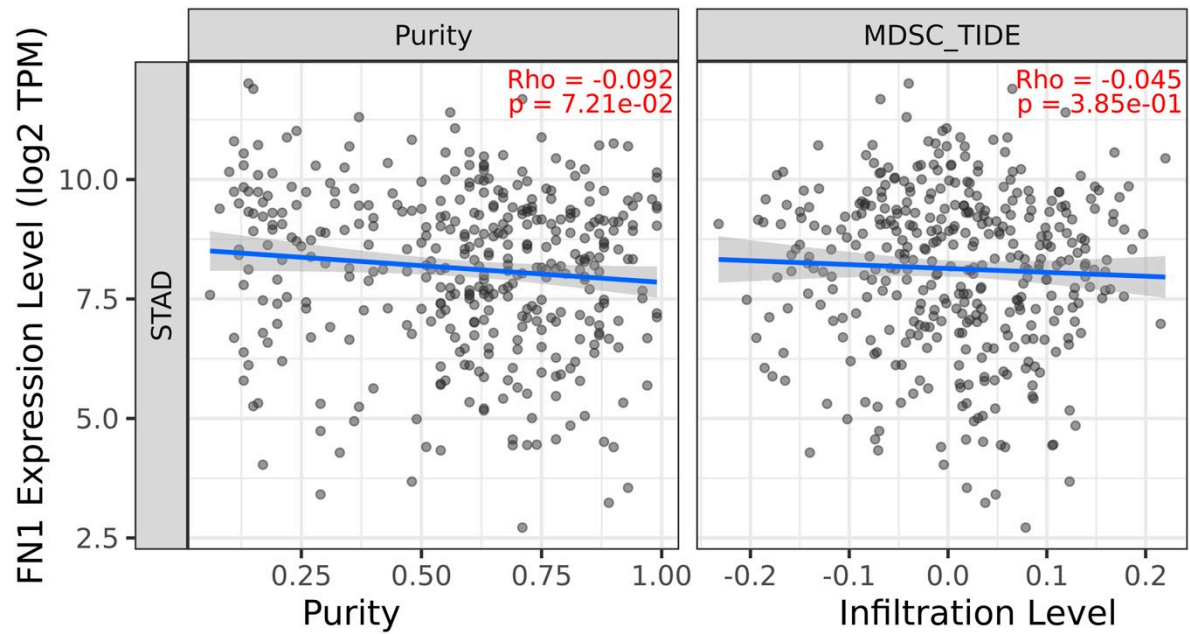



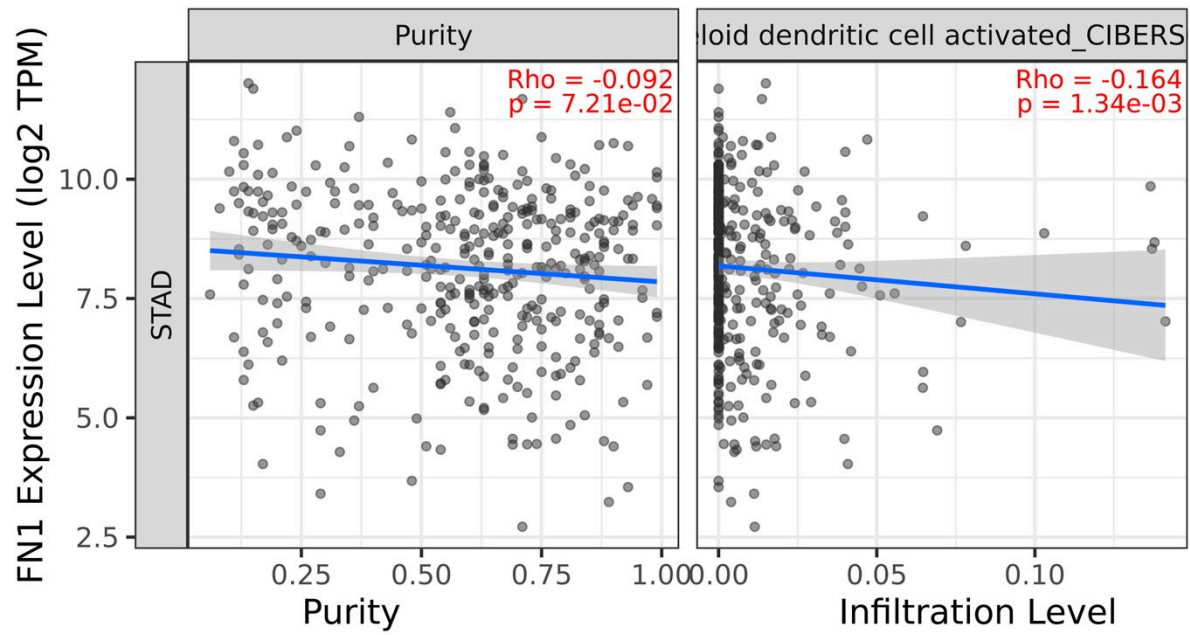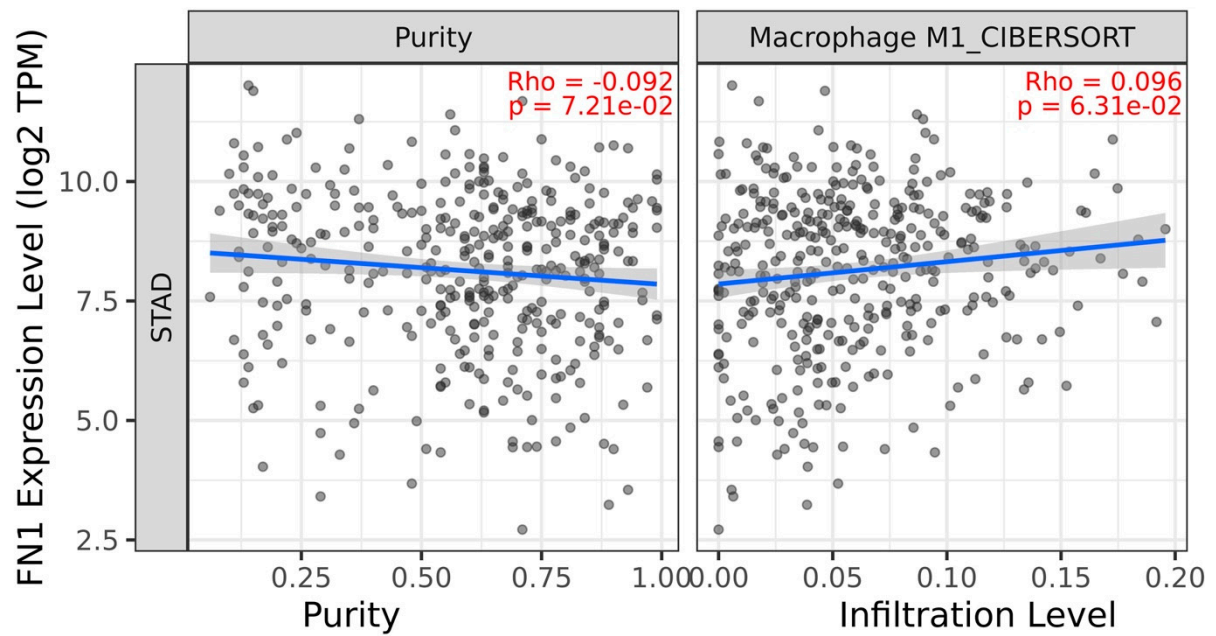

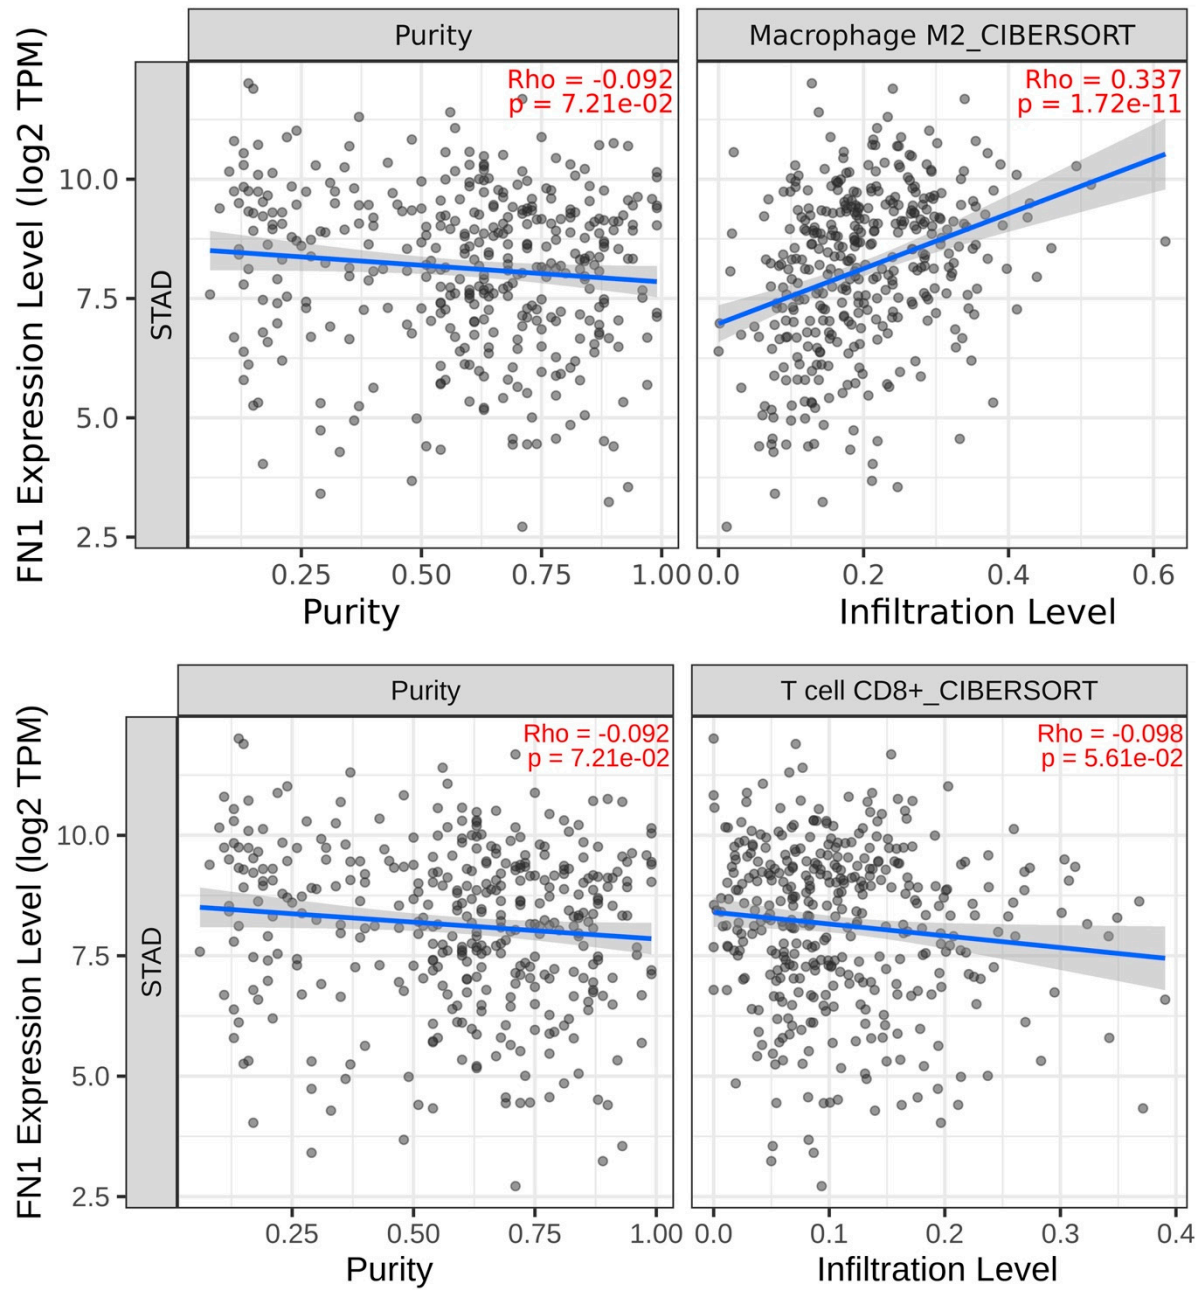

C) THBS2

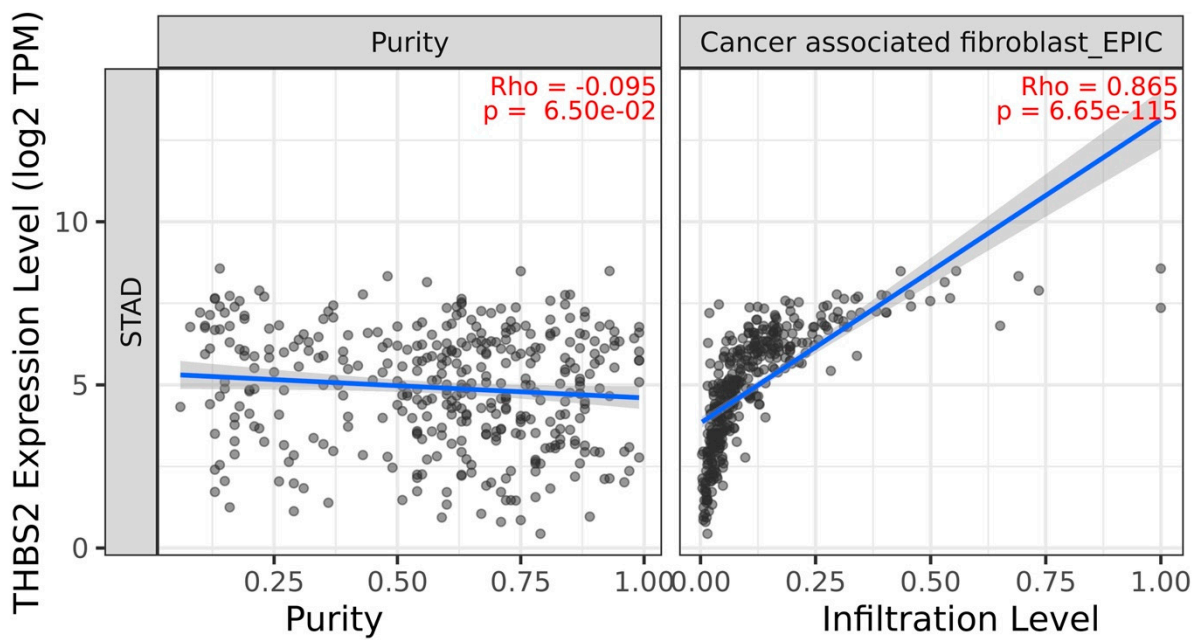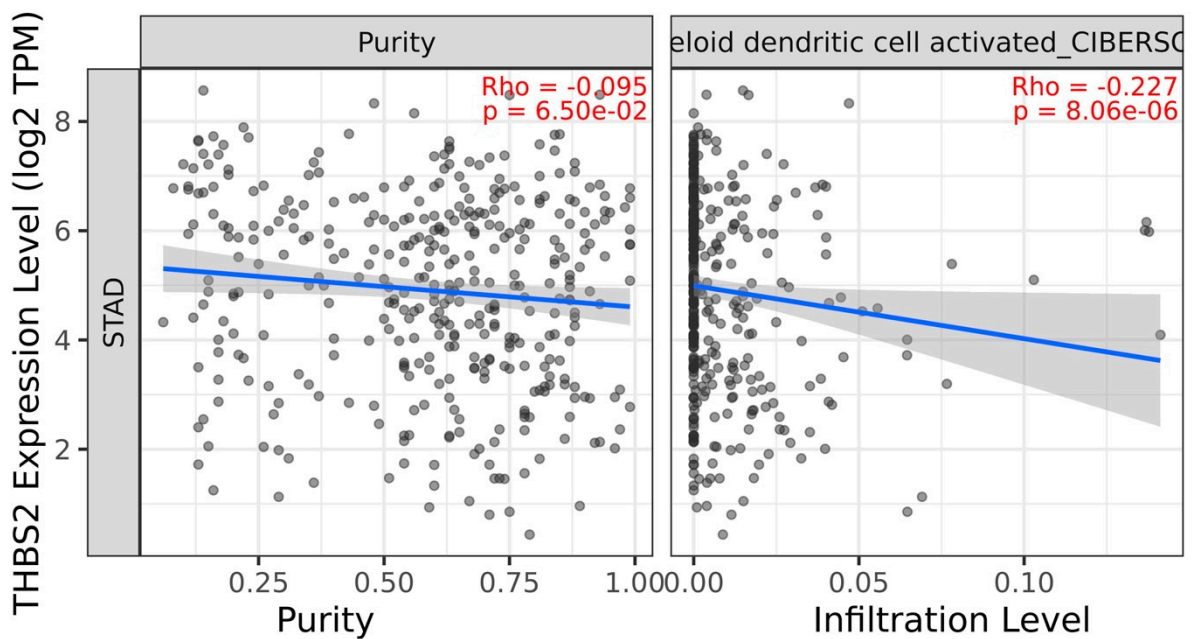

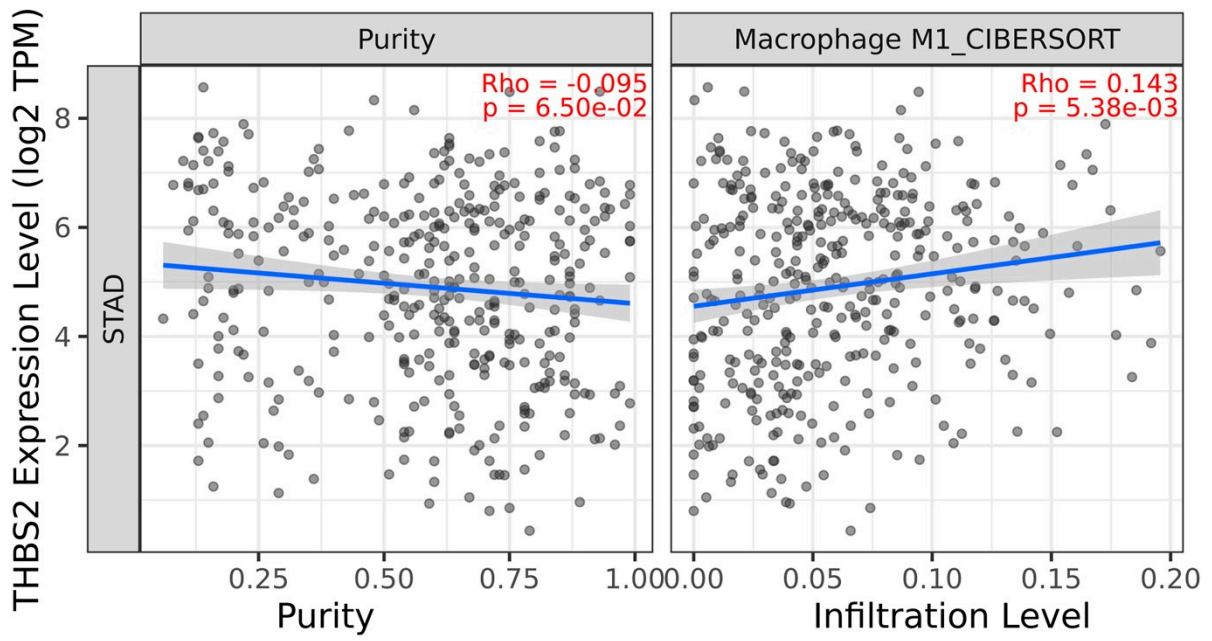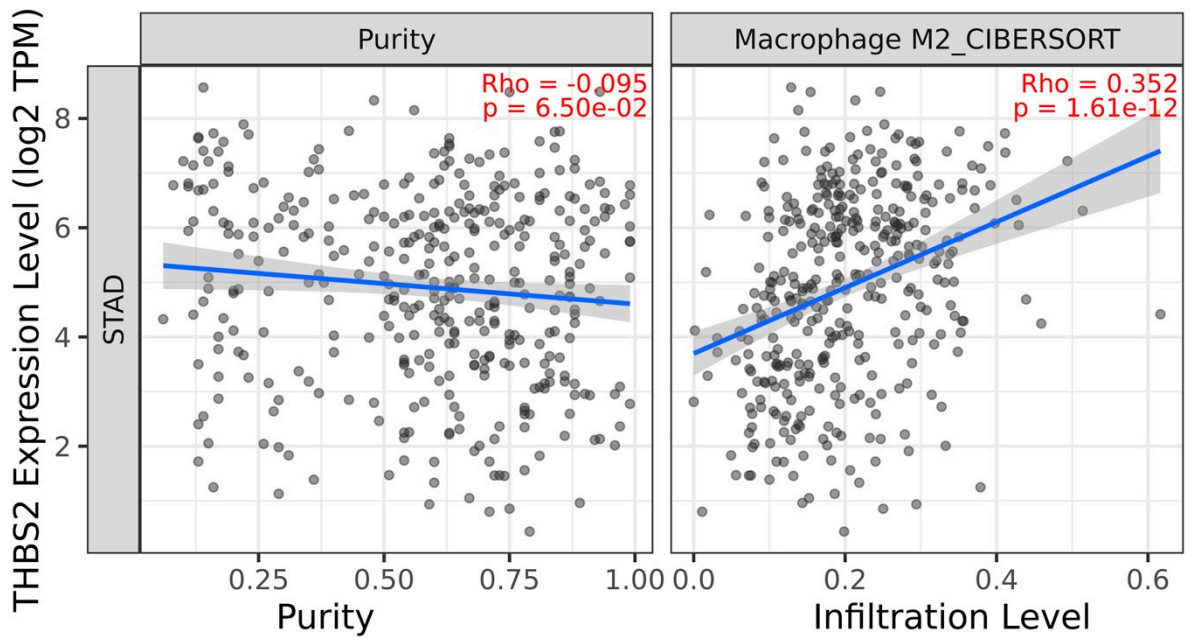



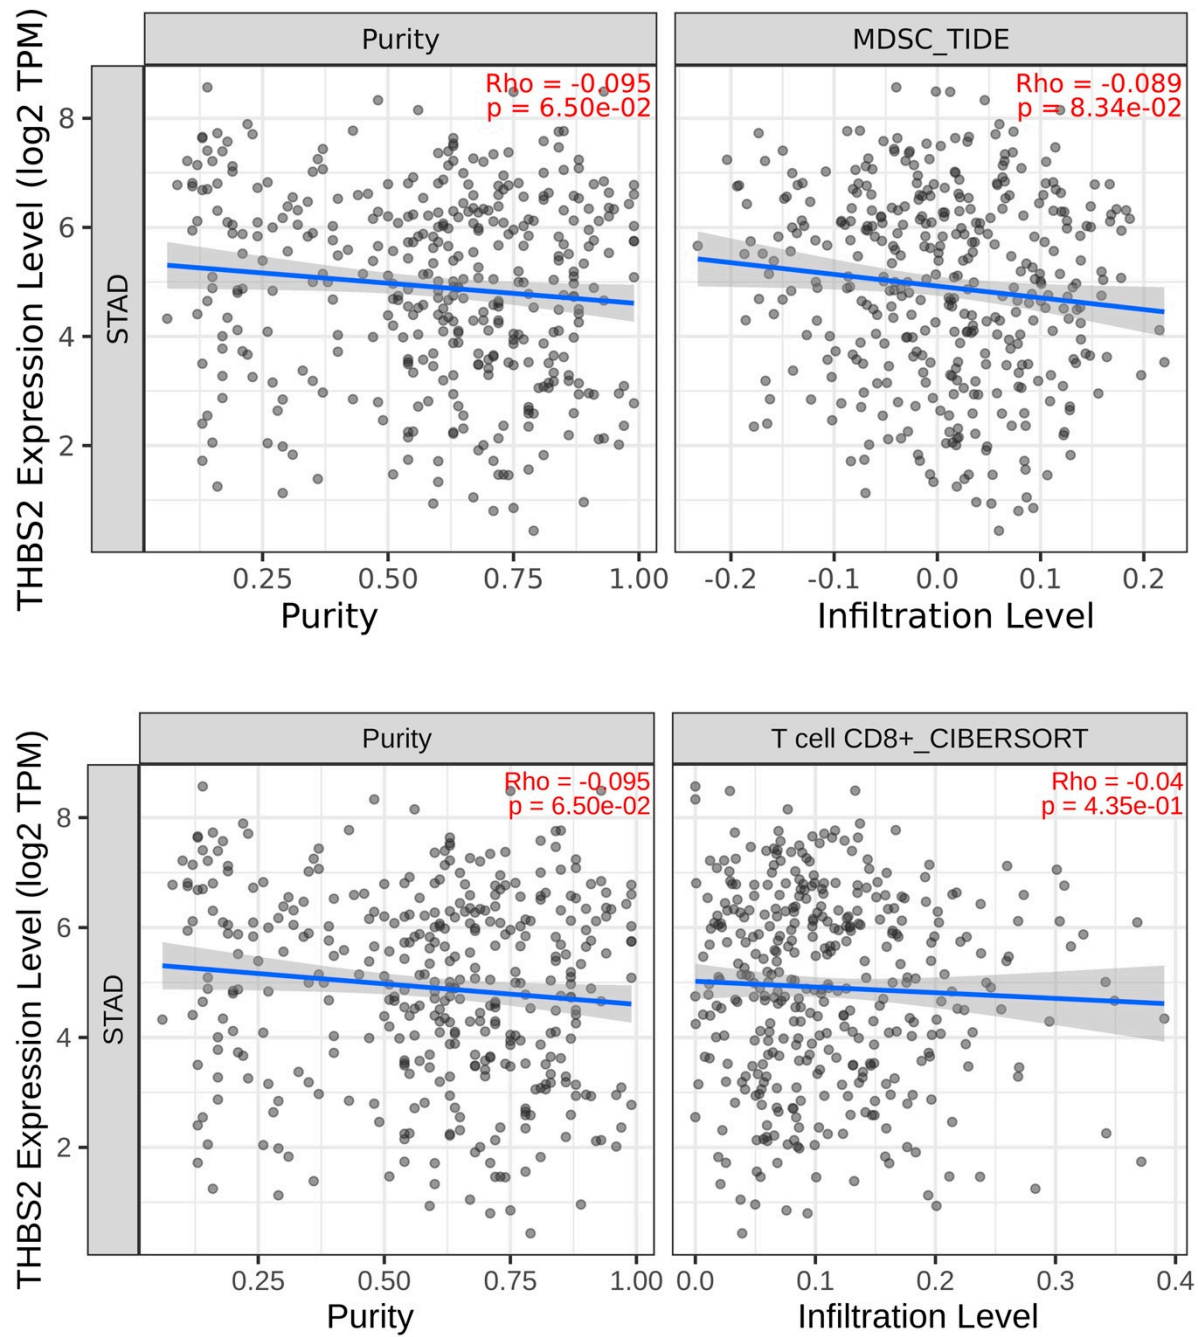

D) COL1A2



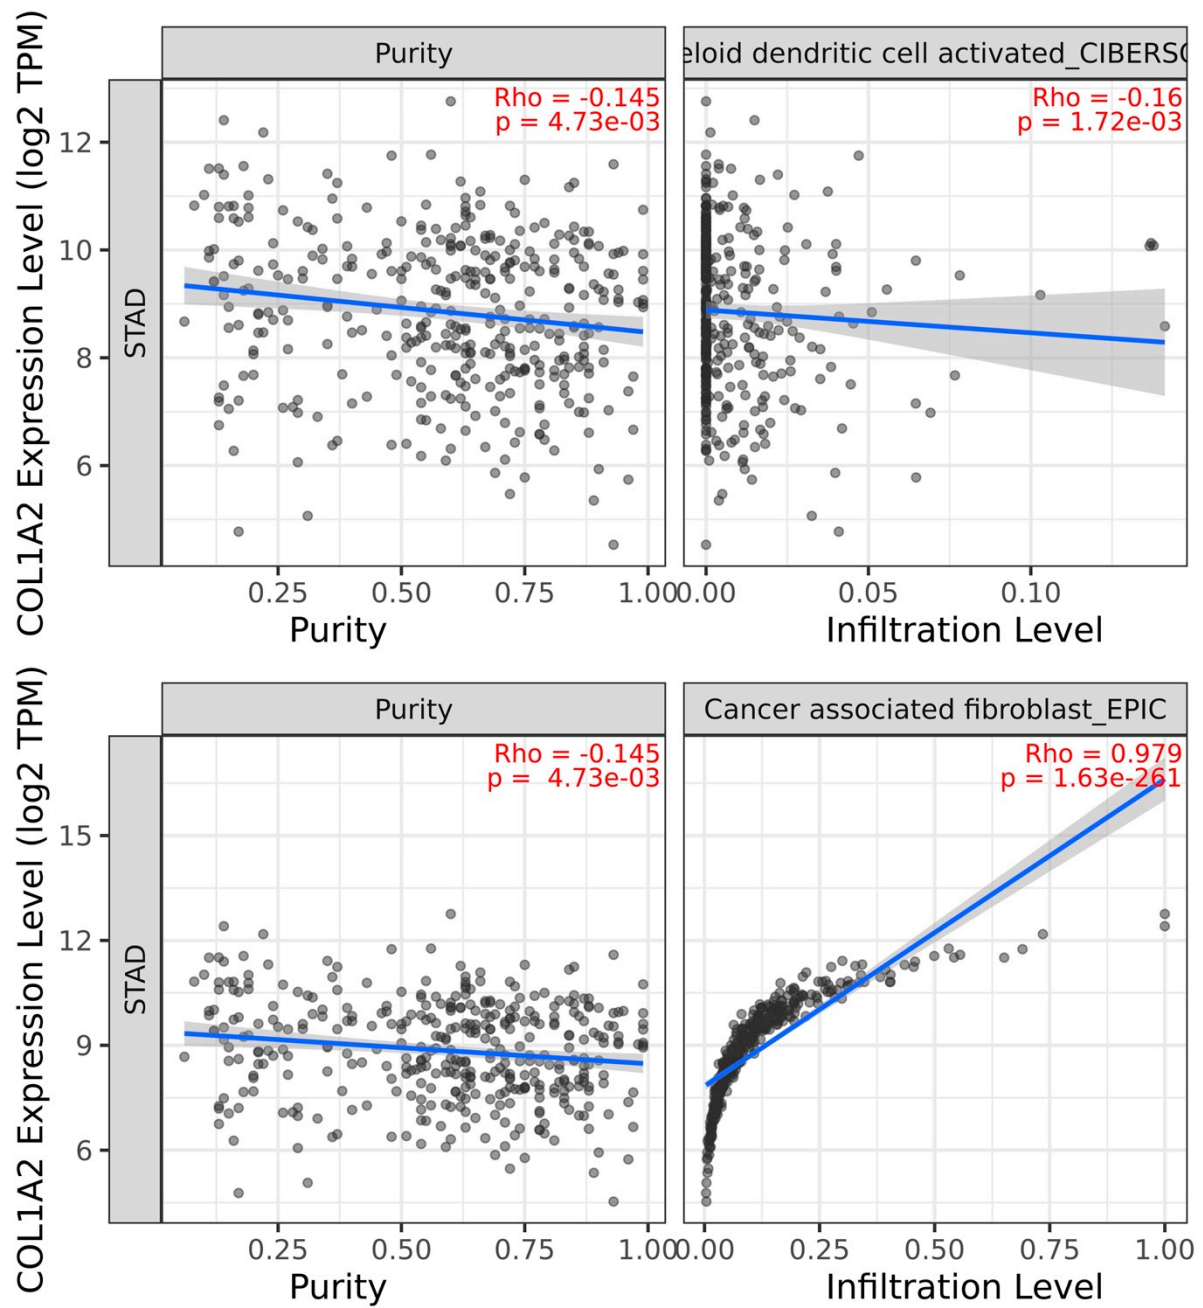

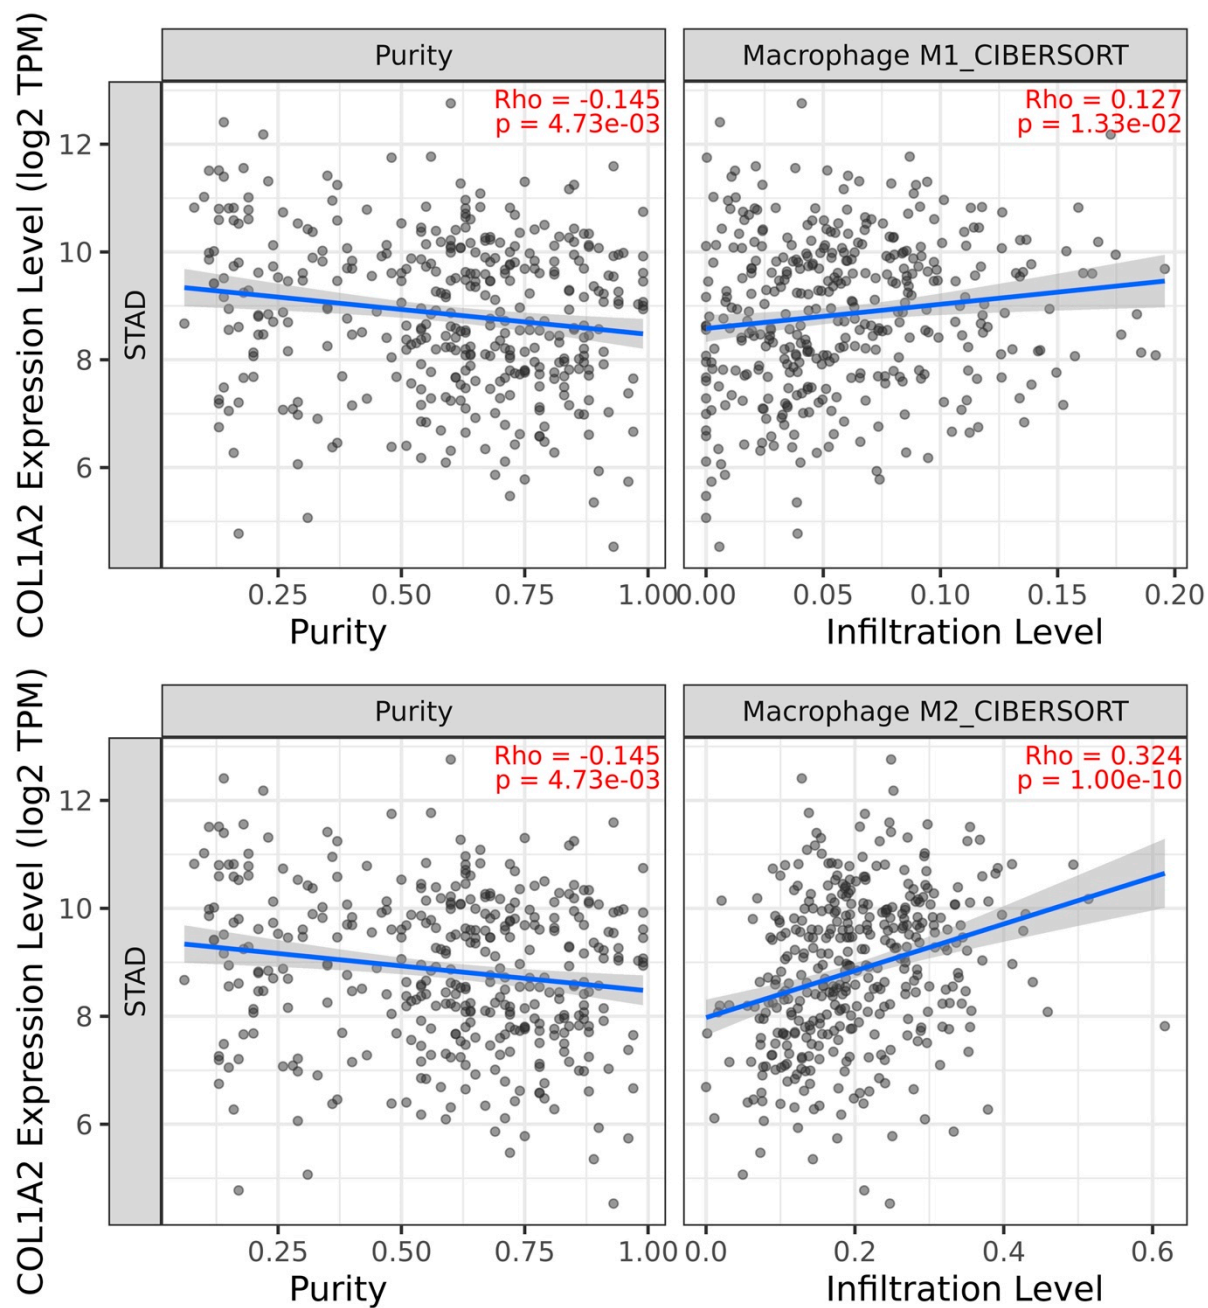

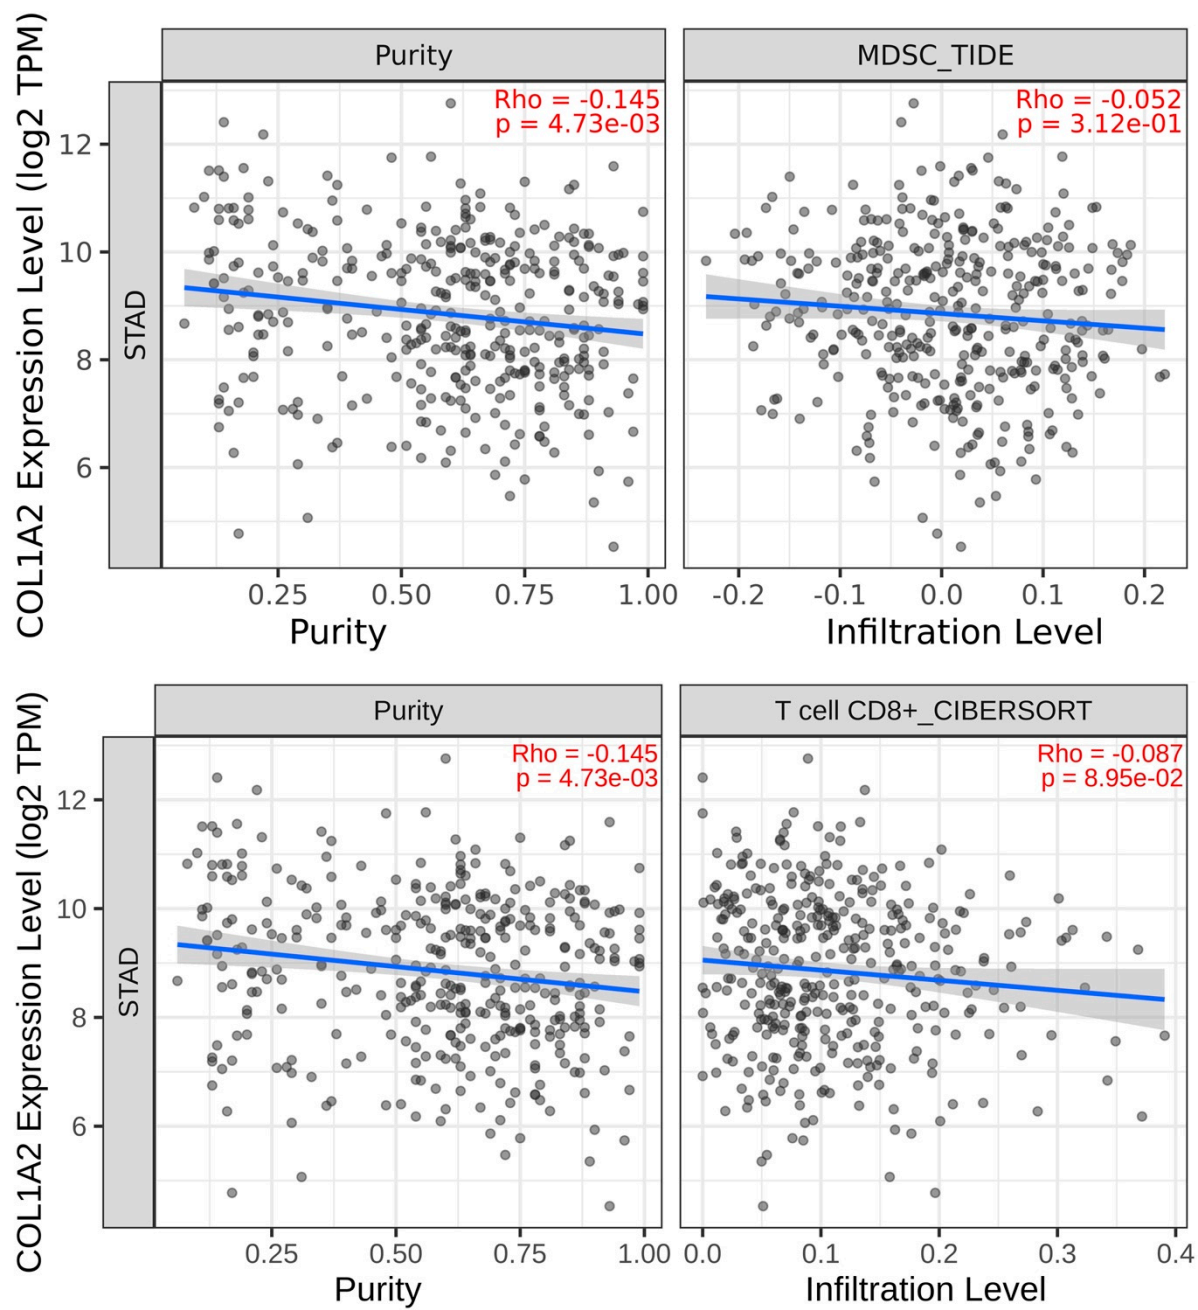

e) COL3A1

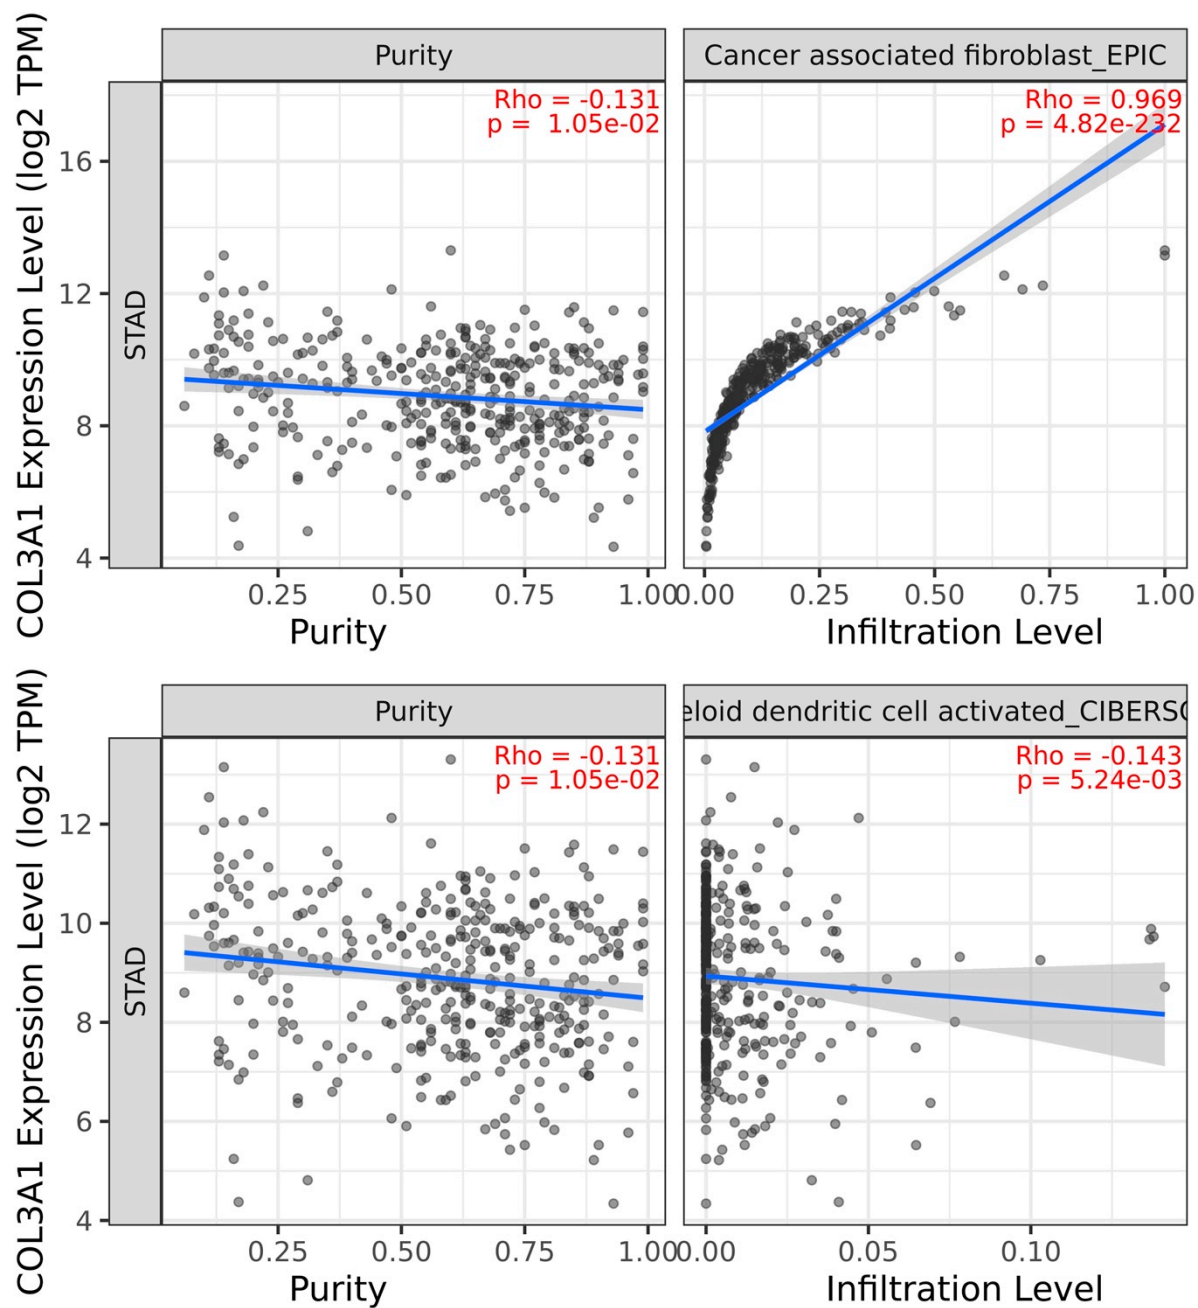

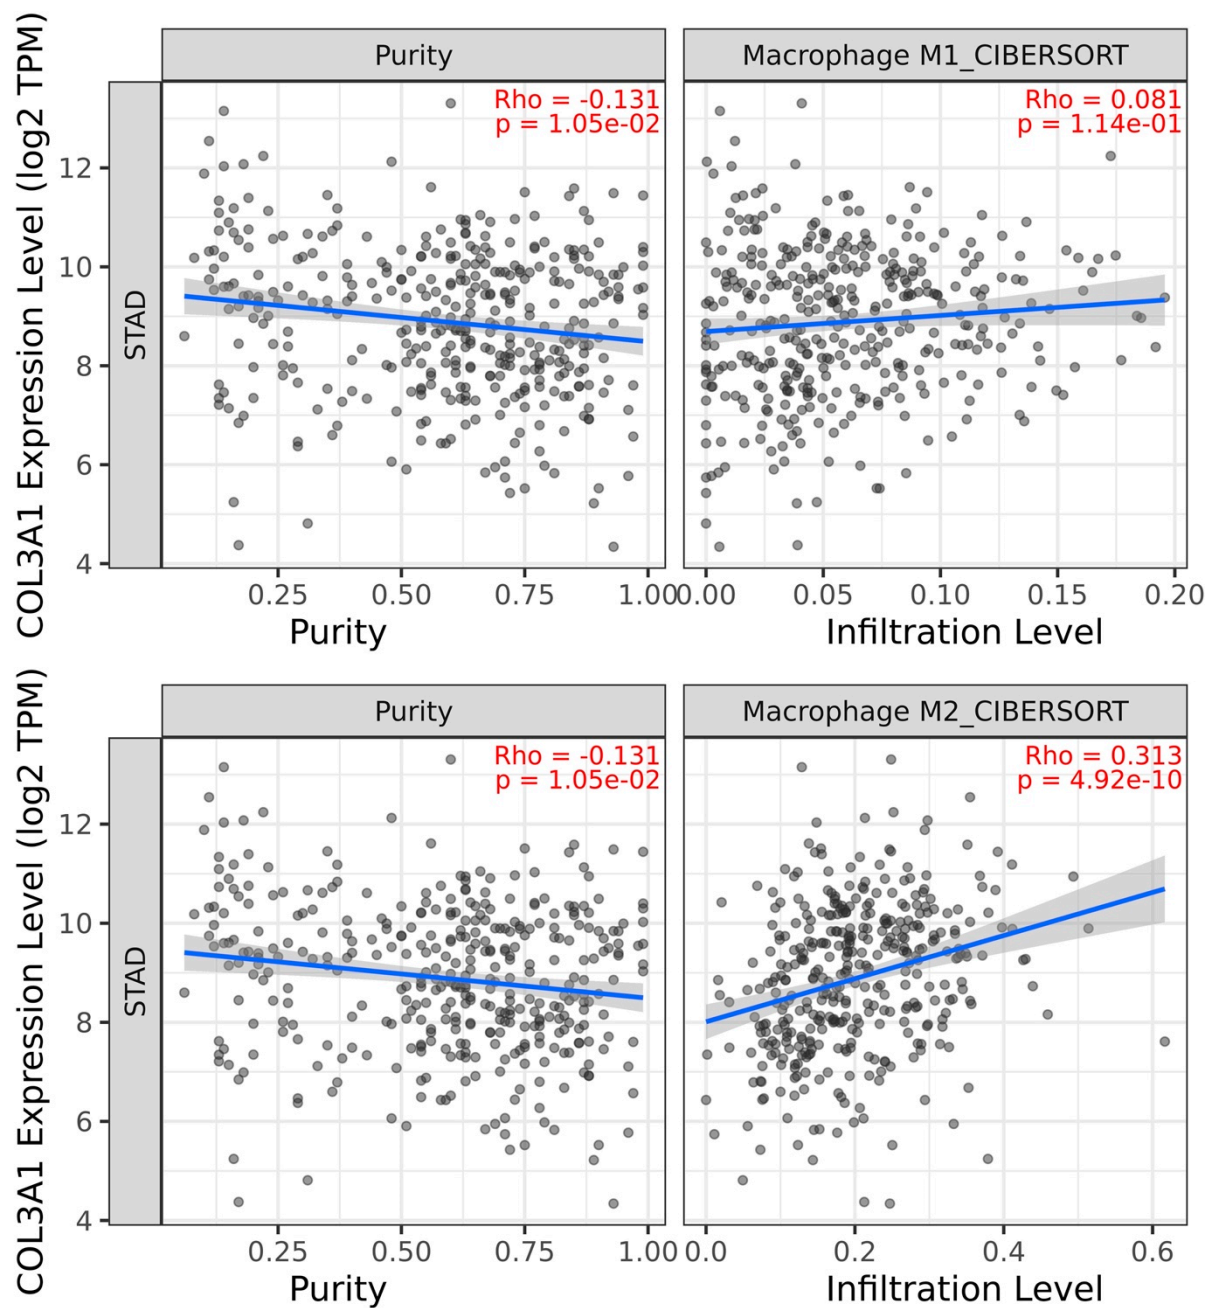



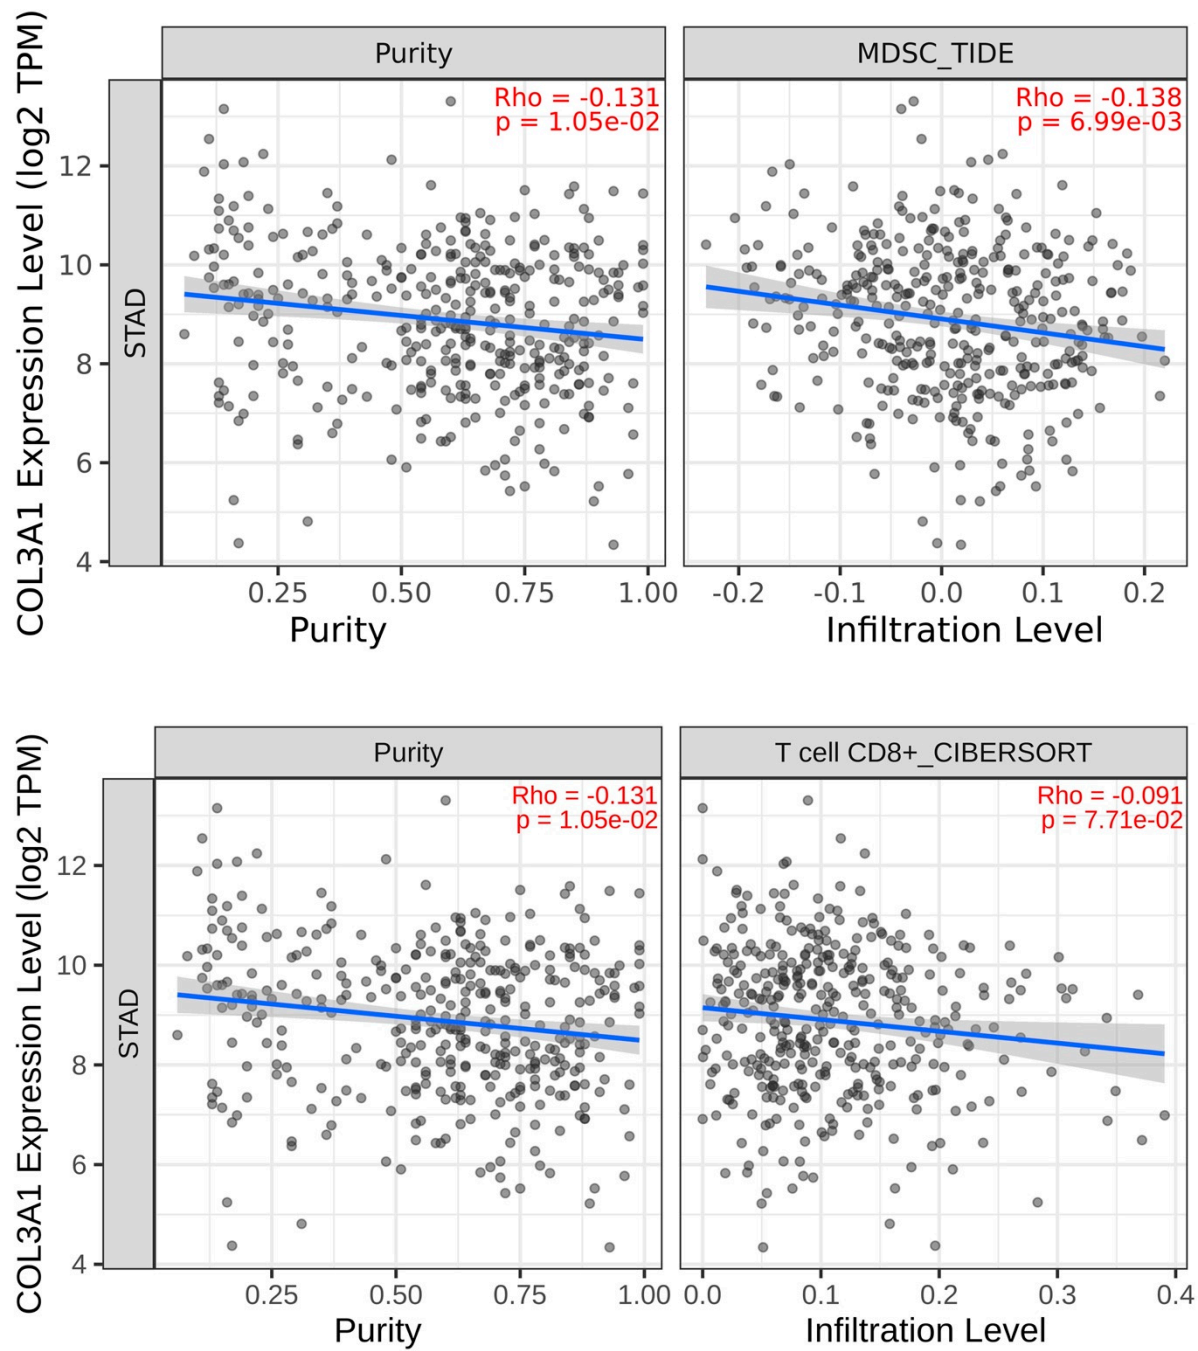

f) COL5A1

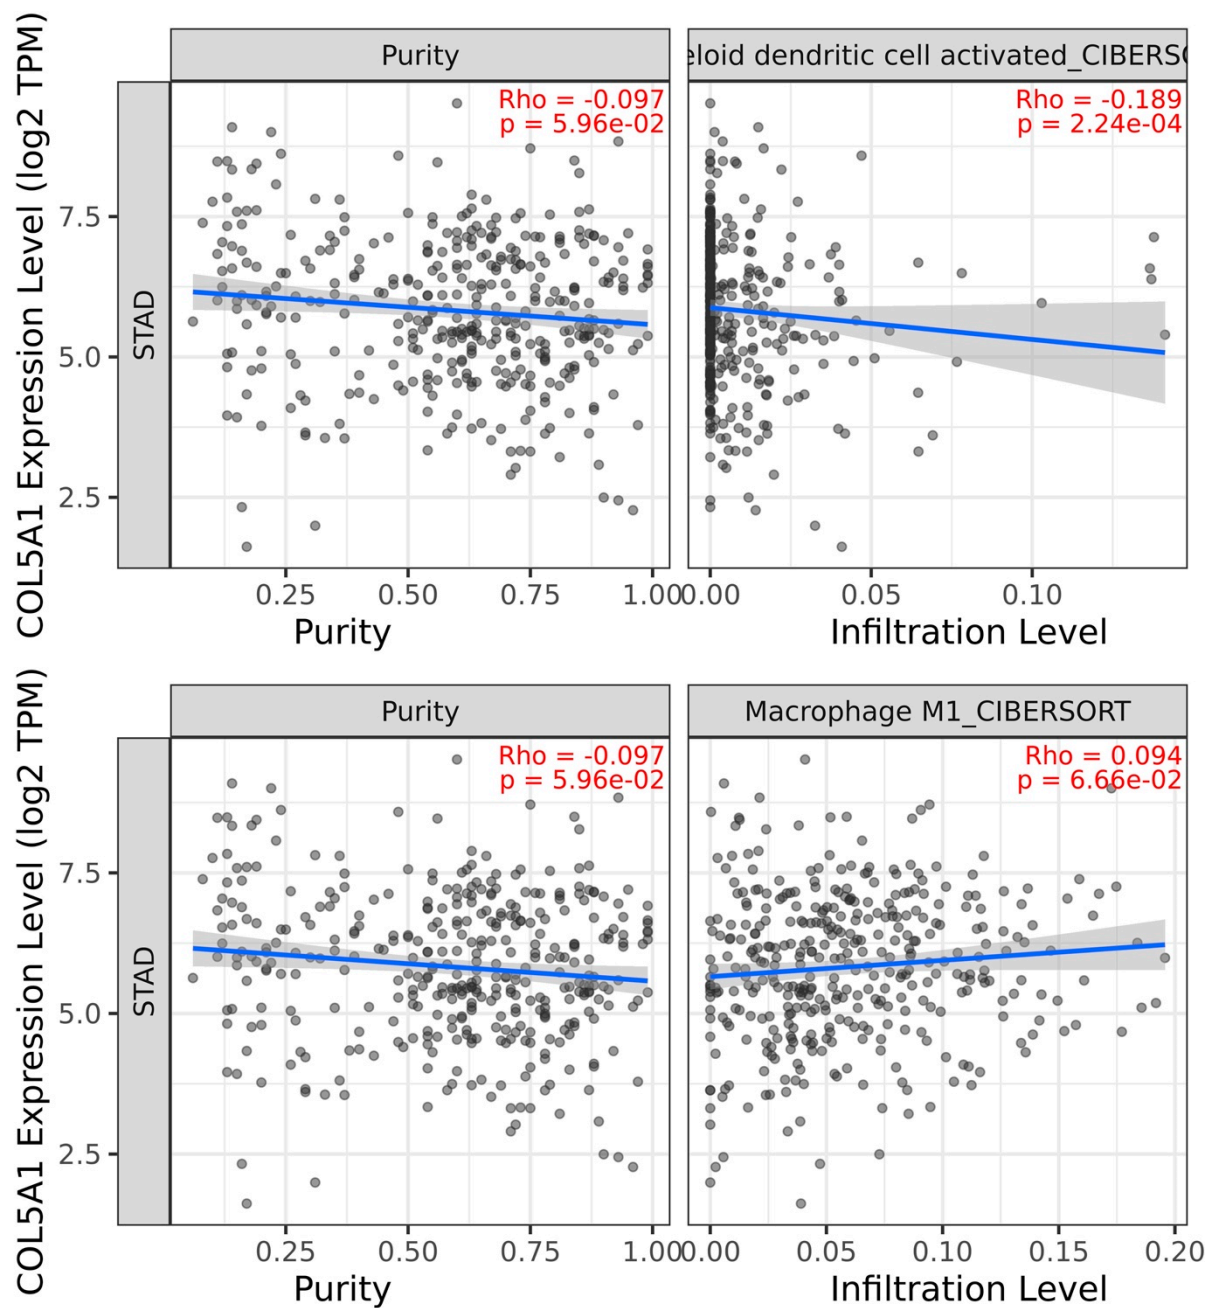

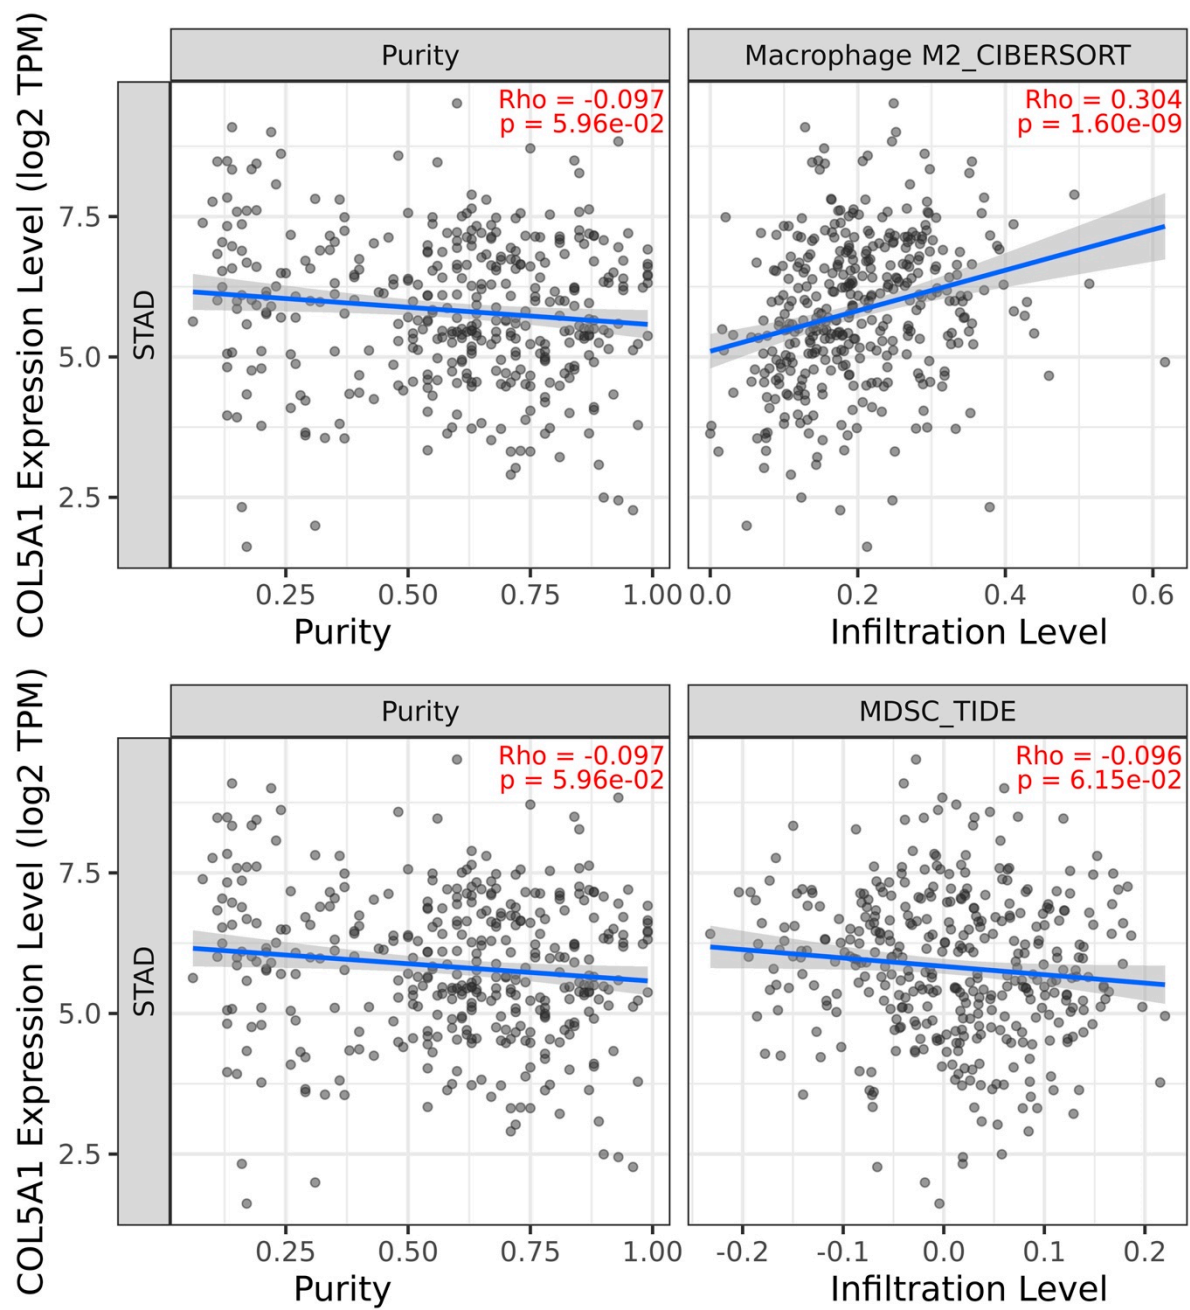

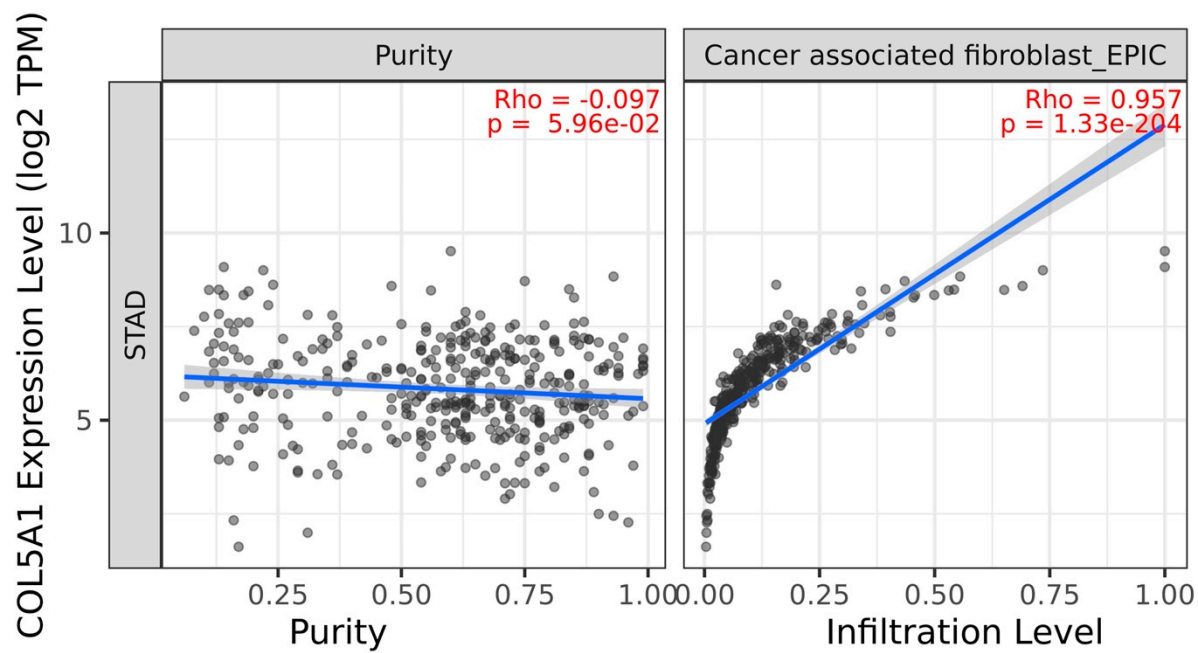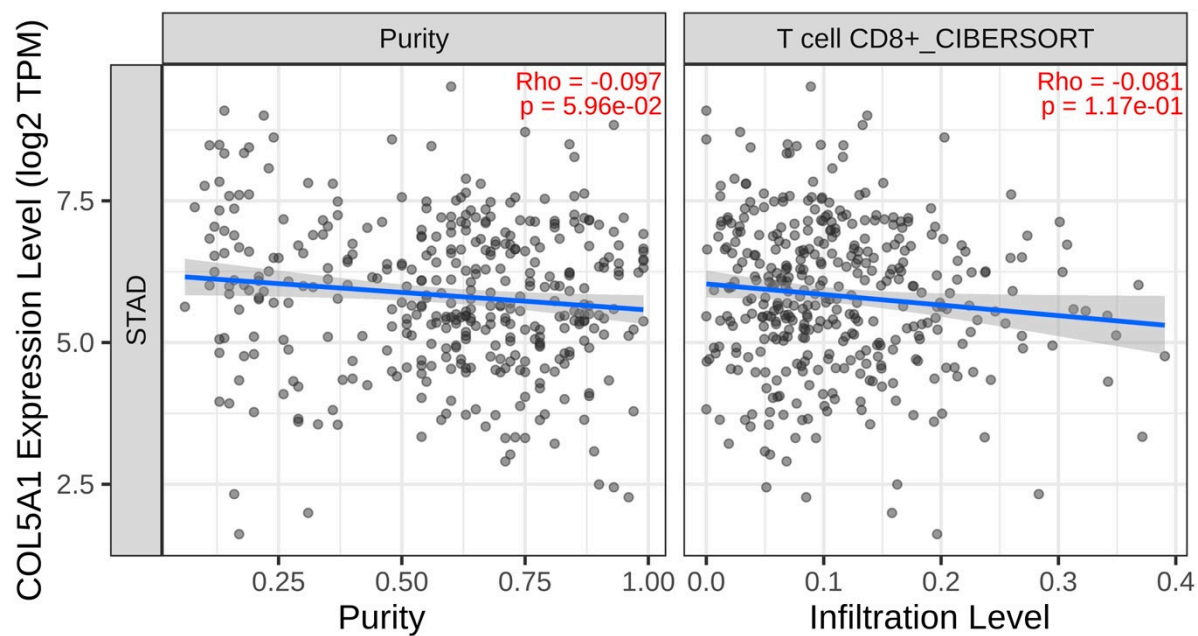

Supplement: s1 [file s1]
