# Supplementary material for: Identification of Key Genes Associated with Tumor Microenvironment Infiltration and Survival in Gastric Adenocarcinoma via Bioinformatics Analysis
Source: MDPI journal article supplement (doi:10.3390/cancers16071280), 2024-03-26
Supplement: s1 [file s1]

Table S1: Down-regulated genes and up-regulated genes in GSE19826

| ID           | Gene.symbol  | Gene.title                                       | log2(fold change) | -log10(Pvalue) |
|--------------|--------------|--------------------------------------------------|-------------------|----------------|
| 1552448_a_at | FAM167A-AS1  | FAM167A antisense RNA 1                          | -3.328            | 4.524          |
| 1552466_x_at | LINC00161    | long intergenic non-protein coding RNA 161       | -2.519            | 3.852          |
| 1552755_at   | C9orf66      | chromosome 9 open reading frame 66               | -2.249            | 3.83           |
| 1553074_at   | ASB11        | ankyrin repeat and SOCS box containing 11        | -2.54             | 4.245          |
| 1553131_a_at | GATA4        | GATA binding protein 4                           | -2.067            | 4.208          |
| 1553174_at   | JPH2         | junctionophilin 2                                | -2.201            | 3.608          |
| 1554018_at   | GPNMB        | glycoprotein nmb                                 | 1.716             | 3.889          |
| 1554810_at   | PLA2G4C      | phospholipase A2 group IVC                       | 1.924             | 3.561          |
| 1555018_at   | OR2C3        | olfactory receptor family 2 subfamily C member 3 | -2.95             | 5.61           |
| 1556368_at   | PHKG2        | phosphorylase kinase catalytic subunit gamma 2   | -2.03             | 3.59           |
| 1556903_at   | LOC101928335 | uncharacterized LOC101928335                     | -2.709            | 3.768          |
| 1557181_s_at | C11orf87     | chromosome 11 open reading frame 87              | -2.203            | 4.797          |
| 1560019_at   | DLGAP1-AS2   | DLGAP1 antisense RNA 2                           | 2.416             | 4.047          |
| 1560725_at   | IL12A-AS1    | IL12A antisense RNA 1                            | -2.056            | 3.645          |
| 1564233_at   | FLJ33534     | uncharacterized LOC285150                        | -1.748            | 4.012          |

|                     |                          |                                                          |        |       |
|---------------------|--------------------------|----------------------------------------------------------|--------|-------|
| <b>1564315_at</b>   | C8orf49                  | chromosome 8 open reading frame 49                       | -1.662 | 5.026 |
| <b>1564333_a_at</b> | PSAPL1                   | prosaposin-like 1 (gene/pseudogene)                      | -2.807 | 4.372 |
| <b>1565666_s_at</b> | MUC6                     | mucin 6, oligomeric mucus/gel-forming                    | -4.305 | 3.871 |
| <b>1567013_at</b>   | NFE2L2                   | nuclear factor, erythroid 2 like 2                       | -1.537 | 4.133 |
| <b>1568574_x_at</b> | SPP1                     | secreted phosphoprotein 1                                | 2.908  | 3.651 |
| <b>1569150_x_at</b> | PDLIM7                   | PDZ and LIM domain 7                                     | 2.396  | 3.614 |
| <b>1569688_at</b>   | FMO5                     | flavin containing monooxygenase 5                        | -2.056 | 3.896 |
| <b>1569900_at</b>   | LOC101927533///LOC440867 | uncharacterized LOC101927533///uncharacterized LOC440867 | -1.672 | 4.301 |
| <b>1570153_at</b>   | CCDC169                  | coiled-coil domain containing 169                        | -2.378 | 4.124 |
| <b>1570627_at</b>   | TCEB3                    | transcription elongation factor B subunit 3              | -2.077 | 3.73  |
| <b>200665_s_at</b>  | SPARC                    | secreted protein acidic and cysteine rich                | 1.647  | 5.605 |
| <b>200938_s_at</b>  | RERE                     | arginine-glutamic acid dipeptide repeats                 | -2.09  | 4.808 |
| <b>201261_x_at</b>  | BGN                      | biglycan                                                 | 2.255  | 4.501 |
| <b>201262_s_at</b>  | BGN                      | biglycan                                                 | 1.797  | 4.109 |

|                    |        |                                              |        |       |
|--------------------|--------|----------------------------------------------|--------|-------|
| <b>201402_at</b>   | GRK2   | G protein-coupled receptor kinase 2          | -2.015 | 3.746 |
| <b>201418_s_at</b> | SOX4   | SRY-box 4                                    | 1.549  | 4.34  |
| <b>201438_at</b>   | COL6A3 | collagen type VI alpha 3 chain               | 1.874  | 6.335 |
| <b>201508_at</b>   | IGFBP4 | insulin like growth factor binding protein 4 | 1.575  | 4.028 |
| <b>201534_s_at</b> | UBL3   | ubiquitin like 3                             | -1.574 | 4.487 |
| <b>201666_at</b>   | TIMP1  | TIMP metalloproteinase inhibitor 1           | 1.815  | 4.137 |
| <b>202310_s_at</b> | COL1A1 | collagen type I alpha 1 chain                | 2.241  | 6.003 |
| <b>202311_s_at</b> | COL1A1 | collagen type I alpha 1 chain                | 2.568  | 5.434 |
| <b>202404_s_at</b> | COL1A2 | collagen type I alpha 2 chain                | 2.58   | 6.65  |
| <b>202766_s_at</b> | FBN1   | fibrillin 1                                  | 1.576  | 4.065 |
| <b>203083_at</b>   | THBS2  | thrombospondin 2                             | 2.732  | 4.156 |
| <b>203381_s_at</b> | APOE   | apolipoprotein E                             | 1.839  | 4.26  |
| <b>203417_at</b>   | MFAP2  | microfibrillar associated protein 2          | 2.278  | 5.867 |
| <b>204051_s_at</b> | SFRP4  | secreted frizzled related protein 4          | 2.471  | 3.563 |
| <b>204073_s_at</b> | MYRF   | myelin regulatory factor                     | -1.633 | 3.739 |
| <b>204114_at</b>   | NID2   | nidogen 2                                    | 1.688  | 4.61  |
| <b>204281_at</b>   | TEAD4  | TEA domain transcription factor 4            | 1.964  | 3.886 |
| <b>204779_s_at</b> | HOXB7  | homeobox B7                                  | 1.836  | 4.127 |

|                    |           |                                                  |        |       |
|--------------------|-----------|--------------------------------------------------|--------|-------|
| <b>204933_s_at</b> | TNFRSF11B | TNF receptor superfamily member 11b              | 2.862  | 3.573 |
| <b>205470_s_at</b> | KLK11     | kallikrein related peptidase 11                  | -2.783 | 3.705 |
| <b>205574_x_at</b> | BMP1      | bone morphogenetic protein 1                     | 2.178  | 3.879 |
| <b>205580_s_at</b> | HRH1      | histamine receptor H1                            | 2.051  | 4.665 |
| <b>205751_at</b>   | SH3GL2    | SH3 domain containing GRB2 like 2, endophilin A1 | -3.92  | 3.779 |
| <b>205876_at</b>   | LIFR      | leukemia inhibitory factor receptor alpha        | -3.118 | 4.416 |
| <b>205941_s_at</b> | COL10A1   | collagen type X alpha 1 chain                    | 3.801  | 4.317 |
| <b>205942_s_at</b> | ACSM3     | acyl-CoA synthetase medium-chain family member 3 | -2.008 | 3.882 |
| <b>206469_x_at</b> | AKR7A3    | aldo-keto reductase family 7 member A3           | -2.344 | 4.124 |
| <b>207331_at</b>   | CENPF     | centromere protein F                             | 2.073  | 3.686 |
| <b>207714_s_at</b> | SERPINH1  | serpin family H member 1                         | 2.786  | 5.824 |
| <b>208321_s_at</b> | CABP1     | calcium binding protein 1                        | -1.924 | 3.899 |
| <b>208432_s_at</b> | CACNA1E   | calcium voltage-gated channel subunit alpha1 E   | -1.714 | 3.88  |
| <b>208850_s_at</b> | THY1      | Thy-1 cell surface antigen                       | 1.892  | 4.342 |
| <b>208851_s_at</b> | THY1      | Thy-1 cell surface antigen                       | 1.718  | 3.818 |
| <b>209652_s_at</b> | PGF       | placental growth factor                          | 1.892  | 4.15  |
| <b>209703_x_at</b> | METTTL7A  | methyltransferase like 7A                        | -1.605 | 3.802 |

|                    |             |                                                       |        |       |
|--------------------|-------------|-------------------------------------------------------|--------|-------|
| <b>209955_s_at</b> | FAP         | fibroblast activation protein alpha                   | 3.768  | 5.333 |
| <b>210155_at</b>   | MYOC        | myocilin                                              | -2.488 | 3.943 |
| <b>210307_s_at</b> | KLHL25      | kelch like family member 25                           | 1.923  | 5.261 |
| <b>210495_x_at</b> | FN1         | fibronectin 1                                         | 1.713  | 4.799 |
| <b>210511_s_at</b> | INHBA       | inhibin beta A subunit                                | 4.807  | 5.391 |
| <b>210619_s_at</b> | HYAL1       | hyaluronoglucosaminidase 1                            | -2.234 | 4.259 |
| <b>211062_s_at</b> | GPR78///CPZ | G protein-coupled receptor<br>78///carboxypeptidase Z | 3.11   | 4.66  |
| <b>211161_s_at</b> | COL3A1      | collagen type III alpha 1 chain                       | 1.622  | 4.904 |
| <b>211689_s_at</b> | TMPRSS2     | transmembrane protease, serine 2                      | -1.852 | 3.797 |
| <b>211709_s_at</b> | CLEC11A     | C-type lectin domain family 11<br>member A            | 2.115  | 3.854 |
| <b>211719_x_at</b> | FN1         | fibronectin 1                                         | 1.718  | 5.017 |
| <b>212353_at</b>   | SULF1       | sulfatase 1                                           | 2.246  | 4.215 |
| <b>212354_at</b>   | SULF1       | sulfatase 1                                           | 2.501  | 4.531 |
| <b>212464_s_at</b> | FN1         | fibronectin 1                                         | 1.723  | 4.591 |
| <b>212488_at</b>   | COL5A1      | collagen type V alpha 1 chain                         | 1.77   | 6.42  |
| <b>213147_at</b>   | HOXA10      | homeobox A10                                          | 2.652  | 3.582 |
| <b>213150_at</b>   | HOXA10      | homeobox A10                                          | 3.871  | 4.703 |
| <b>213553_x_at</b> | APOC1       | apolipoprotein C1                                     | 1.822  | 4.411 |
| <b>213869_x_at</b> | THY1        | Thy-1 cell surface antigen                            | 1.774  | 4.092 |
| <b>213905_x_at</b> | BGN         | biglycan                                              | 2.025  | 4.764 |

|                    |              |                                                                                             |        |       |
|--------------------|--------------|---------------------------------------------------------------------------------------------|--------|-------|
| <b>214502_at</b>   | HIST1H2BJ    | histone cluster 1, H2bj                                                                     | 1.994  | 4.348 |
| <b>215077_at</b>   | COL3A1       | collagen type III alpha 1 chain                                                             | 2.074  | 4.077 |
| <b>215100_at</b>   | ADTRP        | androgen dependent TFPI<br>regulating protein                                               | -1.804 | 3.627 |
| <b>215140_at</b>   |              |                                                                                             | -1.705 | 3.645 |
| <b>215805_at</b>   |              |                                                                                             | -1.981 | 3.653 |
| <b>215833_s_at</b> | SPPL2B       | signal peptide peptidase like 2B                                                            | 1.687  | 3.569 |
| <b>216381_x_at</b> | AKR7A3       | aldo-keto reductase family 7<br>member A3                                                   | -2.185 | 4.158 |
| <b>216442_x_at</b> | FN1          | fibronectin 1                                                                               | 1.801  | 5.014 |
| <b>216552_x_at</b> | KIR2DS4      | killer cell immunoglobulin like<br>receptor, two Ig domains and<br>short cytoplasmic tail 4 | -2.342 | 3.95  |
| <b>216994_s_at</b> | RUNX2        | runt related transcription factor 2                                                         | -1.867 | 3.827 |
| <b>217034_at</b>   | LOC101928457 | uncharacterized LOC101928457                                                                | -2.024 | 4.38  |
| <b>217187_at</b>   | MUC5AC       | mucin 5AC, oligomeric<br>mucus/gel-forming                                                  | -3.091 | 6.206 |
| <b>220304_s_at</b> | CNGB3        | cyclic nucleotide gated channel<br>beta 3                                                   | -2.264 | 4.115 |
| <b>220405_at</b>   | SNTG1        | syntrophin gamma 1                                                                          | -2.232 | 3.839 |
| <b>220636_at</b>   | DNAI2        | dynein axonemal intermediate<br>chain 2                                                     | -2.119 | 4.088 |
| <b>220819_at</b>   | FRMD1        | FERM domain containing 1                                                                    | -2.065 | 4.003 |
| <b>221320_at</b>   | BCL2L10      | BCL2 like 10                                                                                | -1.729 | 3.737 |

|                    |                |                                                                         |        |       |
|--------------------|----------------|-------------------------------------------------------------------------|--------|-------|
| <b>221729_at</b>   | COL5A2         | collagen type V alpha 2 chain                                           | 1.501  | 5.225 |
| <b>222080_s_at</b> | SIRT5          | sirtuin 5                                                               | -1.6   | 3.642 |
| <b>223121_s_at</b> | SFRP2          | secreted frizzled related protein 2                                     | 2.487  | 3.896 |
| <b>224134_at</b>   | MGC10814       | uncharacterized protein<br>MGC10814                                     | -1.701 | 4.318 |
| <b>225571_at</b>   | LIFR           | leukemia inhibitory factor<br>receptor alpha                            | -2.5   | 4.96  |
| <b>226237_at</b>   | COL8A1         | collagen type VIII alpha 1 chain                                        | 2.933  | 5.311 |
| <b>226306_at</b>   | C6orf1         | chromosome 6 open reading<br>frame 1                                    | 1.891  | 4.353 |
| <b>226311_at</b>   | ADAMTS2        | ADAM metalloproteinase with<br>thrombospondin type 1 motif 2            | 2.851  | 4.772 |
| <b>226597_at</b>   | REEP6          | receptor accessory protein 6                                            | 2.637  | 4.454 |
| <b>226695_at</b>   | PRRX1          | paired related homeobox 1                                               | 1.87   | 4.999 |
| <b>226828_s_at</b> | HEYL           | hes related family bHLH<br>transcription factor with YRPW<br>motif-like | 1.543  | 4.049 |
| <b>226997_at</b>   | ADAMTS12       | ADAM metalloproteinase with<br>thrombospondin type 1 motif 12           | 2.363  | 3.964 |
| <b>227140_at</b>   | INHBA          | inhibin beta A subunit                                                  | 4.163  | 5.804 |
| <b>227614_at</b>   | HKDC1          | hexokinase domain containing 1                                          | 2.573  | 3.86  |
| <b>227771_at</b>   | LIFR           | leukemia inhibitory factor<br>receptor alpha                            | -2.088 | 5.104 |
| <b>228231_at</b>   | MIR6836///SNX8 | microRNA 6836///sorting nexin 8                                         | 2.202  | 3.864 |

|                    |                                    |                                                                                                                     |        |       |
|--------------------|------------------------------------|---------------------------------------------------------------------------------------------------------------------|--------|-------|
| <b>228703_at</b>   | P4HA3                              | prolyl 4-hydroxylase subunit alpha 3                                                                                | 2.549  | 4.864 |
| <b>229094_at</b>   | ATP6V0E2-AS1                       | ATP6V0E2 antisense RNA 1                                                                                            | -2.181 | 3.862 |
| <b>229176_at</b>   | ANKH                               | ANKH inorganic pyrophosphate transport regulator                                                                    | 1.845  | 4.507 |
| <b>229218_at</b>   | COL1A2                             | collagen type I alpha 2 chain                                                                                       | 2.001  | 5.036 |
| <b>229254_at</b>   | MFSD4A                             | major facilitator superfamily domain containing 4A                                                                  | -3.914 | 3.574 |
| <b>229661_at</b>   | SALL4                              | spalt like transcription factor 4                                                                                   | 3.063  | 4.268 |
| <b>230271_at</b>   | ONECUT2                            | one cut homeobox 2                                                                                                  | 2.665  | 4.578 |
| <b>230371_at</b>   | HPS6                               | HPS6, biogenesis of lysosomal organelles complex 2 subunit 3                                                        | -1.903 | 4.064 |
| <b>231014_at</b>   | TRIM50                             | tripartite motif containing 50                                                                                      | -2.131 | 3.846 |
| <b>231646_at</b>   | DPCR1                              | diffuse panbronchiolitis critical region 1                                                                          | -4.871 | 4.182 |
| <b>231766_s_at</b> | COL12A1                            | collagen type XII alpha 1 chain                                                                                     | 1.664  | 4.493 |
| <b>231786_at</b>   | HOXA13                             | homeobox A13                                                                                                        | 4.338  | 5.378 |
| <b>232478_at</b>   | MIR181A2HG                         | MIR181A2 host gene                                                                                                  | 1.981  | 3.561 |
| <b>232625_at</b>   | TLN2                               | talin 2                                                                                                             | -1.638 | 4.288 |
| <b>232736_s_at</b> | POM121L10P///POM121L8P///POM121L9P | POM121 transmembrane nucleoporin like 10, pseudogene///POM121 transmembrane nucleoporin like 8, pseudogene///POM121 | 1.886  | 3.565 |



|                  |                                           |                                                                                                                                                                                                                              |        |       |
|------------------|-------------------------------------------|------------------------------------------------------------------------------------------------------------------------------------------------------------------------------------------------------------------------------|--------|-------|
|                  |                                           | transmembrane nucleoporin like 9, pseudogene                                                                                                                                                                                 |        |       |
| <b>233184_at</b> | EPHA6                                     | EPH receptor A6                                                                                                                                                                                                              | -2.276 | 3.581 |
| <b>233446_at</b> | ONECUT2                                   | one cut homeobox 2                                                                                                                                                                                                           | 3.421  | 5.265 |
| <b>233634_at</b> | MARVELD3                                  | MARVEL domain containing 3                                                                                                                                                                                                   | 2.074  | 3.936 |
| <b>233643_at</b> | FAM90A2P///FAM90A25P///FAM86B3P///FAM90A1 | family with sequence similarity 90, member A2 pseudogene///family with sequence similarity 90, member A7 pseudogene///family with sequence similarity 86, member A pseudogene///family with sequence similarity 90 member A1 | -2.292 | 5.716 |
| <b>233978_at</b> | PTPRE                                     | protein tyrosine phosphatase, receptor type E                                                                                                                                                                                | -1.828 | 4.07  |
| <b>234370_at</b> | VSIG1                                     | V-set and immunoglobulin domain containing 1                                                                                                                                                                                 | -3.523 | 3.675 |
| <b>234691_at</b> | KRTAP2-1                                  | keratin associated protein 2-1                                                                                                                                                                                               | -1.889 | 3.574 |
| <b>234999_at</b> | C19orf47                                  | chromosome 19 open reading frame 47                                                                                                                                                                                          | -1.502 | 3.916 |
| <b>235050_at</b> | SLC2A12                                   | solute carrier family 2 member 12                                                                                                                                                                                            | -1.769 | 3.567 |
| <b>235638_at</b> | RASSF6                                    | Ras association domain family member 6                                                                                                                                                                                       | -2.11  | 4.086 |
| <b>236098_at</b> | SMIM6                                     | small integral membrane protein 6                                                                                                                                                                                            | -1.547 | 3.977 |

|                    |                       |                                                                                           |        |       |
|--------------------|-----------------------|-------------------------------------------------------------------------------------------|--------|-------|
| <b>237805_at</b>   | LOC729296             | uncharacterized LOC729296                                                                 | -2.088 | 3.636 |
| <b>238019_at</b>   | PLIN5                 | perilipin 5                                                                               | -1.774 | 4.01  |
| <b>238205_at</b>   | DCAF12L1              | DDB1 and CUL4 associated factor 12 like 1                                                 | -2.963 | 3.613 |
| <b>238481_at</b>   | MGP                   | matrix Gla protein                                                                        | 2.165  | 4.617 |
| <b>238623_at</b>   |                       |                                                                                           | 1.984  | 3.997 |
| <b>238663_x_at</b> | GRIA4                 | glutamate ionotropic receptor AMPA type subunit 4                                         | -3.735 | 4.533 |
| <b>238862_at</b>   | MFSD4A                | major facilitator superfamily domain containing 4A                                        | -3.684 | 4.111 |
| <b>241137_at</b>   | DPCR1                 | diffuse panbronchiolitis critical region 1                                                | -4.212 | 3.837 |
| <b>241502_x_at</b> |                       |                                                                                           | -2.07  | 3.623 |
| <b>242222_at</b>   | LINC01123///LINC01106 | long intergenic non-protein coding RNA 1123///long intergenic non-protein coding RNA 1106 | 1.695  | 3.983 |
| <b>242913_at</b>   | CLIC6                 | chloride intracellular channel 6                                                          | -2.425 | 3.747 |
| <b>242998_at</b>   | RDH12                 | retinol dehydrogenase 12 (all-trans/9-cis/11-cis)                                         | -2.689 | 3.569 |
| <b>243749_s_at</b> | MINCR                 | MYC-induced long noncoding RNA                                                            | -1.726 | 4.175 |
| <b>243764_at</b>   | VSIG1                 | V-set and immunoglobulin domain containing 1                                              | -3.612 | 3.583 |
