# Supplementary material for: Identification of Key Genes Associated with Tumor Microenvironment Infiltration and Survival in Gastric Adenocarcinoma via Bioinformatics Analysis
Source: MDPI journal article supplement (doi:10.3390/cancers16071280), 2024-03-26
Supplement: s1 [file s1]

Supp. Table S2. Intersection of the top ten Hub DEGs.

| Top 10 ranked by BottleNeck method |        |       |
|------------------------------------|--------|-------|
| Rank                               | Name   | Score |
| 1                                  | FN1    | 27.0  |
| 2                                  | SPP1   | 13.0  |
| 3                                  | APOE   | 8.0   |
| 4                                  | COL1A2 | 5.0   |
| 4                                  | VTN    | 5.0   |
| 6                                  | COL1A1 | 3.0   |
| 6                                  | LIF    | 3.0   |
| 6                                  | GATA4  | 3.0   |
| 6                                  | BGN    | 3.0   |
| 6                                  | NANOG  | 3.0   |
| Top 10 ranked by Degree method     |        |       |
| Rank                               | Name   | Score |
| 1                                  | FN1    | 39.0  |
| 2                                  | COL1A1 | 29.0  |
| 3                                  | BGN    | 25.0  |
| 4                                  | COL1A2 | 24.0  |
| 4                                  | SPP1   | 24.0  |
| 4                                  | COL3A1 | 24.0  |

|                                    |             |                    |
|------------------------------------|-------------|--------------------|
| 7                                  | THBS2       | 21.0               |
| 8                                  | COL5A1      | 20.0               |
| 9                                  | APOE        | 19.0               |
| 9                                  | TIMP1       | 19.0               |
| <b>Top 10 ranked by MCC method</b> |             |                    |
| <b>Rank</b>                        | <b>Name</b> | <b>Score</b>       |
| 1                                  | COL1A1      | 3.7164295E7        |
| 2                                  | COL1A2      | 3.7148928E7        |
| 3                                  | COL3A1      | 3.714572E7         |
| 4                                  | COL5A1      | 3.7144848E7        |
| 5                                  | COL5A2      | 3.6973566E7        |
| 6                                  | SERPINH1    | 3.673152E7         |
| 7                                  | COL10A1     | 3.665664E7         |
| 8                                  | FN1         | 2.2127592E7        |
| 9                                  | COL6A3      | 2.193948E7         |
| 10                                 | COL8A1      | 2.193408E7         |
| <b>Top 10 ranked by EPC method</b> |             |                    |
| <b>Rank</b>                        | <b>Name</b> | <b>Score</b>       |
| 1                                  | FN1         | 23.12299999999993  |
| 2                                  | COL1A1      | 22.64099999999994  |
| 3                                  | BGN         | 22.335999999999956 |

|                                    |             |                    |
|------------------------------------|-------------|--------------------|
| 4                                  | COL1A2      | 22.20499999999994  |
| 5                                  | COL3A1      | 21.976999999999965 |
| 6                                  | COL5A1      | 21.200999999999965 |
| 7                                  | SPP1        | 20.432999999999957 |
| 8                                  | THBS2       | 20.39299999999997  |
| 9                                  | COL6A3      | 20.373999999999977 |
| 10                                 | SPARC       | 20.179999999999986 |
| <b>Top 10 ranked by MNC method</b> |             |                    |
| <b>Rank</b>                        | <b>Name</b> | <b>Score</b>       |
| 1                                  | FN1         | 39.0               |
| 2                                  | COL1A1      | 28.0               |
| 3                                  | BGN         | 25.0               |
| 4                                  | COL1A2      | 24.0               |
| 4                                  | SPP1        | 24.0               |
| 4                                  | COL3A1      | 24.0               |
| 7                                  | COL5A1      | 20.0               |
| 7                                  | THBS2       | 20.0               |
| 9                                  | TIMP1       | 19.0               |
| 10                                 | APOE        | 18.0               |
